# Supplementary material
Source: PubMed Central journal article supplement (PMC7243727)
Supplement: NIHMS1541618-supplement-401_2019_2086_MOESM1_ESM.pdf [file NIHMS1541618-supplement-401_2019_2086_MOESM1_ESM.pdf]

## Supplemental Figure Legends

**Supplemental Figure 1. Germline and somatic mutations in the *NF1* gene.** (a) Table showing mutation positions compared to the canonical *NF1* gene transcript (ENST00000358273) and HS canonical protein product (ENSP00000351015). Reads showing reference sequence or variant alleles and the percent of variant reads were visually verified using IGV. (b) The location of predicted germline and somatic mutations in the canonical *NF1* protein detected in PNF and DNF. Same-position mutations found in different cohorts are marked.

**Supplemental Figure 2. QQ plots of burden test and lollipop plots of some candidate germline mutated genes.**

(a) Burden testing was performed using TRAPD and results were then visually represented by quantile-quantile (QQ) plots. Because ExAC samples and the case samples are not jointly processed and variant-called, the level of technical artifacts potentially introduced in this analysis (artifact inflation/deflation) were measured using the  $\lambda_{\Delta 95}$  metric implemented in TRAPD. We detected small levels of inflation (i.e. above the optimal  $\lambda_{\Delta 95} > 1.00$ ), likely due to the small case sample size and incomplete ancestry information. (b) Lollipop plots of *COL14A1*, *CELSR2*, *CUBN* and *FCGBP*. Each variant's functional impact was predicted by three bioinformatics tools and ClinVar dataset (see Methods and supplemental tables) but only effect predicted by SIFT was shown in the figure.

**Supplemental Figure 3. Neurofibroma Schwann cell somatic variants.** **(a)** Summary table of non-synonymous rare somatic variants in PNF and DNF datasets. (i.e. number and percent of patients harboring somatic variants from whole exome sequencing (WES) data from SC versus matched FB; percent of NF1 patients harboring variants in a WGS dataset from dermal neurofibroma versus matched blood, or in a WES dataset from PNF<sup>1</sup> **(Material and Methods)**). Notably, compared with low mutation ratio of the designated genes in cancers in COSMIC, these genes show a high percentage of variants in neurofibroma SCs, and also showed variants in the DNF<sup>2</sup> and/or PNF cohorts. Color bars on the right indicate the variant type, based on predicted effects on mRNA. Numbers are the number of tumors harboring variants in each gene in the PNFSC cohort. **(b)** Heat map of mRNA expression of those genes with expression level changes, in either tumor SC vs. normal SC and/or tumor tissue vs. nerve databases. **(c)** Lollipop plots showing the predicted effects of variants by SIFT on proteins. The genomic position of each variant detected in PNF was converted into the amino acid position of the corresponding protein product.

**Supplemental Figure 4. Variants in *OBSCN* and *PKHD1L1*.** **(a)** Summary table, Non-synonymous rare variants and the percentages of tumor samples with variants in these genes in PNF and DNF datasets **(b)** Gene variants are shown in 3 groups (I, II, and III); those with a germline variant and a 2<sup>nd</sup> allele somatic variant (I); germline variant only (II) or somatic variant only (III). FB: fibroblast; SC: Schwann cell. Color bars indicate variant types, based on predicted effects on the mRNA. Numbers at right of color bars are the total number of PNF (of 9) harboring variants in each gene. Individual neurofibromas



harbor different variants in *OBSCN* and *PKHD1L1* (i.e. for *OBSCN*, 1 neurofibroma showed a germline plus a second allele somatic mutations; 5 tumors harbored only a germline variant; 1 tumor sample harbored only a somatic variant). **(c)** Lollipop plots showing the predicted effects of variants on *OBSCN* and *PKHD1L1* protein function by SIFT. The genomic position of each variant detected in PNF was converted into the amino acid position of the corresponding protein product.

**Supplemental Figure 5. Oncoprint analysis of candidate genes.**

Oncoprint analysis of top 47 candidate (somatic and germline) genes in 9 PNF tumors generated by cBioPortal.

**Supplemental Figure 6. Detailed description of *ATM* variants.** Y: yes; N: Not found yet. The number (#) of databases that predicted a variant to be damaging.

**Supplemental Figure 7. *ATM* germline variant confirmation, and proliferation in neurofibromas with *ATM* WT or *ATM* MU. (a, b)** Sanger sequencing results for 2 different *ATM* germline variants. **(c)** Percent of Ki67 positive cells in neurofibromas with *ATM* MU vs. *ATM* WT (un-paired Student's *t*-test).

**Supplemental Figure 8. Guide RNA and donor DNA sequences for variant construction, and shATM effects on SC growth. (a)** *ATM* gene and amino acid sequence are highly conserved between human and mouse around the G2023R and S707P positions. In addition to a point mutation change in the donor DNA sequences, to

avoid Cas9 re-cutting we wobbled DNA sequences (green text) that were not predicted to change the amino acid sequence. In the donor DNA, there are ~50nt homology arms flanking the cut site. **(b, d)** sh*ATM* reduced *Atm* mRNA (RT-PCR) and ATM protein (western blot) in immortalized human Schwann cells (iHSC) and primary mouse embryonic SC (eSC). **(c, e)** sh*ATM* does not affect iHSC or eSC cell viability (MTS assays).

**Supplemental Figure 9. Histological analysis of neurofibromas in *Nf1 fl/fl; DhhCre* and *Atm+/-; Nf1 fl/fl; DhhCre* mice.** Neurofibromas were embedded in paraffin (n=10 tumors from 3 mice per genotype). **(a)** H&E staining, S100 marks SC, Toluidine blue metachromasia (purple) staining marks mast cells. **(b)** Statistical analysis of Toluidine blue+ mast cells/HPF (high power field) indicates an increased number of mast cells in neurofibromas from *Atm+/-; Nf1 fl/fl; DhhCre* mice. (Un-paired t-test, \*p<0.05, \*\*p<0.01, \*\*\*p<0.001, \*\*\*\*p<0.0001)

## SUPPLEMENTARY TABLES

Supplementary Table 1. Each sample's depth of coverage.

Supplementary Table 2. *NF1* gene Germline and somatic mutation status in NF1 patients

Supplementary Table 3: Top 22 genes showing germline variants

Supplementary Table 4: Top 25 genes showing somatic variants.

Supplementary Table 5: Germline variants in top 22 genes present in DNF<sup>2</sup> data

Supplementary Table 6: Somatic variants in top 25 genes present in DNF<sup>2</sup> data

Supplementary Table 7: Germline variants in top 22 genes present in PNF<sup>1</sup> data

Supplementary Table 8: Somatic variants in top 25 genes present in PNF<sup>1</sup> data

Supplementary Table 9: Datasets used for variant function prediction

## Supplementary Methods

### Germline Variant Calling

We considered the same rare and non-synonymous variant detected both in a SC sample and its matched FB sample as a probable germline mutation variant. Our “rare” variant filtering strategy is described below.

### Somatic Variant Calling

Variant callers use different approaches to call variants, so we integrated results from methods described in Xu *et al*<sup>3</sup>. and Cai *et al*<sup>4</sup>. We used GATK-naiveSubtract, MuTect1, Strelka, SomaticSniper and VarScan2 to predict somatic point mutations (SNPs). INDELS were predicted using GATK-naiveSubtract, Strelka and VarScan2.

**GATK-naiveSubtract** The GATK-naiveSubtract method<sup>3</sup> was used to call SNV and INDEL variants present in a SC sample VCF file but not in its matched control (FB) sample VCF file. Variants set for case and control samples were called independently using

GATK-HaplotypeCaller. For stringent filtering, we considered PASS-tagged variants passing  $GQ > 20$  and  $DP > 20$  cutoffs.

**MuTect1 (v1.1.7)** MuTect1<sup>5</sup> detects SNPs only and is bundled into the GATK pipeline. To run this version of MuTect1, we used GATK v2.8 with java v1.7.0u40. We also used human genome (v37) bundled with GATK bundle 2.8. COSMIC v54 and dbSNP 132 (b37).

**VarScan2 (v2.3.9)** VarScan2<sup>6</sup> detects SNPs, INDELs, and loss of heterozygosity events (LOH) in NGS data. SAMTOOLS v1.3 was used to make mpileup (-B q 1 -f). To perform somatic filtering, we used bam-readcount (-q 1 -b 20). After variant calling, we applied recommended somatic filters together with bam-readcount (-q 1 -b 20 -f). Java 1.8.0\_40 was used to run this version of VarScan2.

**Strelka (v1.0.15):** Strelka<sup>7</sup> detects SNPs and INDELs. SAMTOOLS v1.3, java v1.7.0u40 were used to run Strelka and a recommended built-in post-calling filter was used to remove possible false positives.

**SomaticSniper (v1.0.5):** SomaticSniper<sup>8</sup> detects SNPs. SAMTOOLS v1.3 and bcftools v1.3 were used for the SomaticSniper pipeline. We set the somatic quality threshold of SomaticSniper to 15 (the author recommended 15-40). Raw call sets generated by SomaticSniper were filtered by pipelines proposed by the developers.

**Variant Filtering Strategy** We defined common variants (minor alternative reads ratio [MAF],  $>1\%$ ) in a public data set as lower priority. We adopted dbSNP's GMAF  $< 1\%$  and ExAC MAF  $< 1\%$  as MAF-filtering criteria. If both MAF scores were  $<1\%$ , then we chose ExAC MAF. We also included possible novel variants that do not have defined MAF scores. We focused on non-synonymous variants found in protein coding canonical gene

transcript exon and splicing regions predicted to have HIGH / MODERATE / MODIFIER-impact functional effects. “HIGH” includes variants predicted to have disruptive impact on a protein, e.g. stop gained or frameshift variants causing protein truncation, loss of function or triggering nonsense mediated decay. “MODERATE” is a predicted non-disruptive variant that might change protein structure or function (e.g. missense variant, inframe deletion). “MODIFIER” includes predicted non-coding variants or variants affecting non-coding genes, where prediction is difficult or there is no evidence of impact; these were ignored in our analysis. We also ignored variants labeled “LOW”, alterations assumed to be harmless or unlikely to change protein behavior.

For somatic mutations, we considered HIGH, MODERATE, and MODIFIER-impact variants with min [GMAF < 1%, ExAC MAF < 1%], or novel. For germline mutations, we considered HIGH/MODERATE/MODIFIER-impact variants whose MAF < 1%. For analysis of the *NF1* gene, we considered HIGH- and MODERATE-impact variants satisfying these MAF-filtering criteria. The numbers of rare and non-synonymous HIGH, MODERATE, MODIFIER, and LOW-impact variants were plotted. Final variants were visually examined using an Integrative Genomics Viewer (IGV, <https://www software.broadinstitute.org/software/igv>).

**Low-Complexity Regions.** Based on 1,462,754 low-complexity region data (human v37 whole genome) predicted by mdust<sup>9</sup>, we checked +/- 20 nucleotide-long subsequences from called variant loci to determine if they fall into predicted low complexity regions. This does not mean the sequencing qualities of these variants are low. We used this information to prioritize candidates.

**Variants effect prediction:** Variant Annotation Variants from these 5 methods were annotated using Variant Effect Predictor (VEP) v83<sup>10</sup> using Ensemble human genome (v37) and add-in databases and online algorithms including dbNSFP (v2.9)<sup>11</sup> and ClinVar (release: 20170104, <https://www.ncbi.nlm.nih.gov/clinvar/>)<sup>12</sup>, dbSNP (v144, <https://www.ncbi.nlm.nih.gov/projects/SNP/>), Exome Aggregation Consortium (ExAC v0.3.1, <http://exac.broadinstitute.org/>), SIFT (v5.2.2), and HGMP-PUBLIC (v20152, <http://www.hgmd.cf.ac.uk/ac/index.php>). Annotated VCF files were converted to tab-delimited tables for data exploration using in-house PERL and BASH scripts. Mutation impact was annotated using ClinVar<sup>12</sup>, SIFT<sup>13</sup>, MetaLR<sup>14</sup> and MetaSVM<sup>14</sup>, included in the dbNSFP database (**Suppl. Table 9**).

**MTS assay** iHSC cells cultured in basic medium (10% Gem-Cell Fetal Bovine Serum in Gibco DMEM, 1% HyClone Penicillin-streptomycin solution) and primary mouse embryonic Schwann cells cultured in basic medium with 2uM forskolin (Calbiochem) and 10ng/ml  $\beta$ -heregulin (R&D system) were plated at 500 cells/well in 96 well plates (Corning, Black). After 3 days of culture, cell titer aqueous one solution for cell proliferation assay (Promega) was added to the wells according to the manufacturer's protocol. The plates then were read at 490nm absorbance 4 hours later. Three independent experiments with 5 replicates/sample in each experiment were performed and used for statistical analysis.

**Un-paired t-test.** To test if germline variants in the *ATM* gene cause differential effects to the total variants number, we calculated the  $\Delta$  in number of total variants in SC vs. FB from each individual neurofibroma. We applied un-paired t-tests between the groups of

neurofibromas with and without *ATM* variants. The p-value is derived from calculated t-statistics. We used the t. test function, implemented in Prism.

**Sanger sequencing primers for ATM germline variants confirmation:**

Chr11: 108198394 C>A

Forward: TGGCAAAGCAGATGAGGAAAAC

Reverse: TCACTCCACCCTAGAGACTATACA

Chr11: 108098576 C>G

Forward: CTGCTGCCGTCAACTAGAACAT

Reverse: AAATGCCAAATTCATATGCAAGGC

Chr11: 108123621 T>G

Forward: ATGGTTGTCCTCCTTAAATTGTCCT

Reverse: AAACAACCTCTTCCCTGGCTAA

**Full sequence of Donor DNA for G2023R:**

AATTACTATCTAGAAAGTGCAGTTTACCTAGTAAGGGGTTGTAACATTTTCCCTCTC  
CCGCAACCATACAGGCTGTCCGGCTCTCCTATACTTCTGTAGATCTCTAAGAGAAG  
ATCCTGCAAACAGA

**Full sequence of Donor DNA for S707P:**

AACCCATAAATGCTCAAGAATACACCTGAATTCGTTTTAAGAAATCTCACCTCAGGA  
GAATAGTTGCTTAAGAGCTGTTCTGATAATCCCAGAAGATAGTGATCCAATGATTCC  
TTGAGATTTTGCT

**Sanger sequencing primer for G2023R colony confirmation:**

Forward: CTGCGTAAACTTCACTGATACAC

Reverse: TTCAAGTCTCTGCCTTTGGTATT

**Sanger sequencing primer for S707P colony confirmation:**

Forward: GCACTCCTTCCCACTAACCTA

Reverse: AAGTGAACAACACTGCGAAGATAA



## Reference

1. Pemov, A. *et al.* The primacy of NF1 loss as the driver of tumorigenesis in neurofibromatosis type 1-associated plexiform neurofibromas. *Oncogene* **36**, 3168-3177 (2017).
2. Gosline, S.J. *et al.* A high-throughput molecular data resource for cutaneous neurofibromas. *Sci Data* **4**, 170045 (2017).
3. Xu, H., DiCarlo, J., Satya, R.V., Peng, Q. & Wang, Y. Comparison of somatic mutation calling methods in amplicon and whole exome sequence data. *BMC Genomics* **15**, 244 (2014).
4. Cai, L., Yuan, W., Zhang, Z., He, L. & Chou, K.C. In-depth comparison of somatic point mutation callers based on different tumor next-generation sequencing depth data. *Sci Rep* **6**, 36540 (2016).
5. Cibulskis, K. *et al.* Sensitive detection of somatic point mutations in impure and heterogeneous cancer samples. *Nat Biotechnol* **31**, 213-9 (2013).
6. Koboldt, D.C. *et al.* VarScan 2: somatic mutation and copy number alteration discovery in cancer by exome sequencing. *Genome Res* **22**, 568-76 (2012).
7. Saunders, C.T. *et al.* Strelka: accurate somatic small-variant calling from sequenced tumor-normal sample pairs. *Bioinformatics* **28**, 1811-7 (2012).
8. Larson, D.E. *et al.* SomaticSniper: identification of somatic point mutations in whole genome sequencing data. *Bioinformatics* **28**, 311-7 (2012).
9. Li, H. Toward better understanding of artifacts in variant calling from high-coverage samples. *Bioinformatics* **30**, 2843-51 (2014).
10. McLaren, W. *et al.* The Ensembl Variant Effect Predictor. *Genome Biol* **17**, 122 (2016).
11. Liu, X., Jian, X. & Boerwinkle, E. dbNSFP v2.0: a database of human non-synonymous SNVs and their functional predictions and annotations. *Hum Mutat* **34**, E2393-402 (2013).
12. Landrum, M.J. *et al.* ClinVar: public archive of relationships among sequence variation and human phenotype. *Nucleic Acids Res* **42**, D980-5 (2014).
13. Ng, P.C. & Henikoff, S. Predicting deleterious amino acid substitutions. *Genome Res* **11**, 863-74 (2001).
14. Dong, C. *et al.* Comparison and integration of deleteriousness prediction methods for nonsynonymous SNVs in whole exome sequencing studies. *Hum Mol Genet* **24**, 2125-37 (2015).

## a NF1 germline and somatic mutation status in different NF1 patients

| Sample | Position    | REF               | ALT | Effect              | HGMD ID  | ClinVar           | Cell type | Status        | Reads with reference allele(FB/SC) | Reads with mutation allele(FB/SC) | % of mutation reads |
|--------|-------------|-------------------|-----|---------------------|----------|-------------------|-----------|---------------|------------------------------------|-----------------------------------|---------------------|
| T1     | 17:29652983 | A                 | T   | stop gained         |          |                   | FB/SC     | germline      | 42/53                              | 48/52                             | 53/50               |
|        | 17:29664575 | C                 | G   | missense            |          |                   | SC        | somatic       | 79                                 | 37                                | 47                  |
|        | 17:29664862 | G                 | T   | missense            |          |                   | SC        | somatic       | 41                                 | 4                                 | 9                   |
| T2     | 17:29562746 | C                 | G   | missense            | CM040785 | likely pathogenic | FB/SC     | germline      | 35/33                              | 36/34                             | 51/51               |
|        | 17:29509674 | CATGAAT<br>AAGGTA | C   | splicing            |          |                   | SC        | somatic       | 35                                 | 7                                 | 16                  |
|        | 17:29677252 | G                 | T   | missense            |          |                   | SC        | somatic       | 117                                | 6                                 | 5                   |
| T3     | 17:29497003 | C                 | T   | stop gained         | CM000774 | pathogenic        | SC        | somatic       | 52                                 | 13                                | 25                  |
| T4     | 17:29585518 | A                 | G   | missense            |          | pathogenic        | FB/SC     | germline      | 79/44                              | 61/39                             | 44/47               |
|        | 17:29556042 | G                 | A   | splicing            |          | pathogenic        | SC        | somatic       | 35                                 | 6                                 | 15                  |
| T5a    | 17:29483145 | G                 | A   | splicing            |          | pathogenic        | FB/SC     | germline      | 109/136                            | 116/109                           | 51/44               |
|        | 17:29533315 | C                 | T   | stop gained         | CM000780 | pathogenic        | SC        | somatic       | 192                                | 85                                | 44                  |
| T5c    | 17:29483145 | G                 | A   | splicing            |          | pathogenic        | FB/SC     | germline      | 118/210                            | 130/118                           | 52/36               |
|        | 17:29562641 | C                 | T   | stop gained         | CM000799 | pathogenic        | SC        | somatic       | 191                                | 32                                | 14                  |
| T6     | 17:29560021 | C                 | T   | splicing/synonymous |          |                   | FB/SC     | germline      | 41/12                              | 29/46                             | 41/79               |
|        | 17:29546122 | C                 | T   | stop gained         | CM020463 | pathogenic        | SC        | somatic       | 74                                 | 20                                | 21                  |
|        | 17:29556143 | G                 | A   | stop gained         | CM076345 | pathogenic        | SC        | somatic       | 41                                 | 8                                 | 16                  |
| T7     | 17:29557401 | G                 | A   | splicing            |          | pathogenic        | FB/SC     | germline      | 42/0                               | 34/67                             | 45/100              |
|        | 17:29557401 | G                 | A   | splicing            |          | pathogenic        | SC        | Somatic (LOH) | 0                                  | 67                                | 100                 |
| T8     | 17:29677208 | T                 | TA  | frame shift         |          | pathogenic        | FB/SC     | germline      | 272/276                            | 104/116                           | 28/30               |
|        | 17:29562709 | AG                | A   | frame shift         |          |                   | SC        | somatic       | 147                                | 73                                | 50                  |

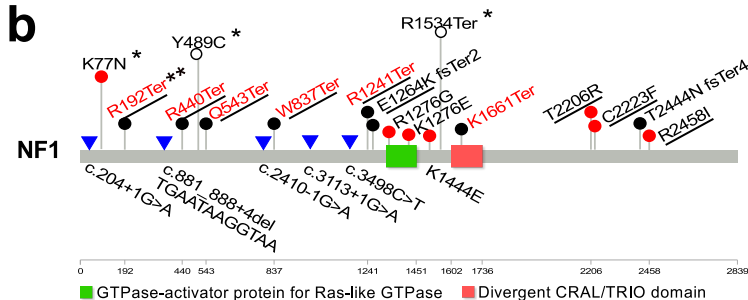

**a**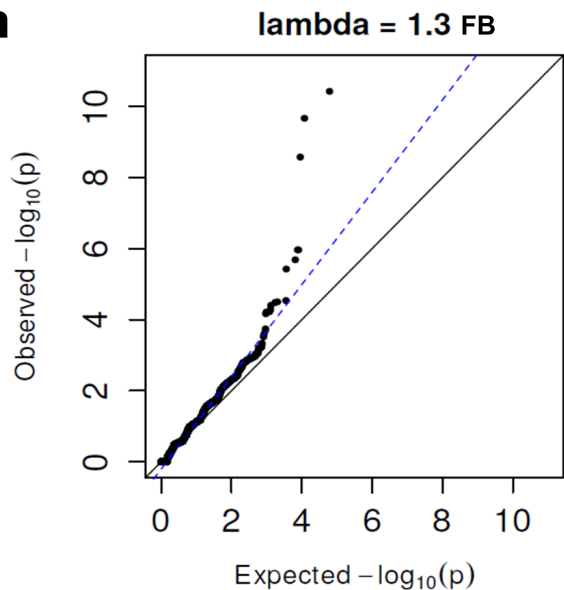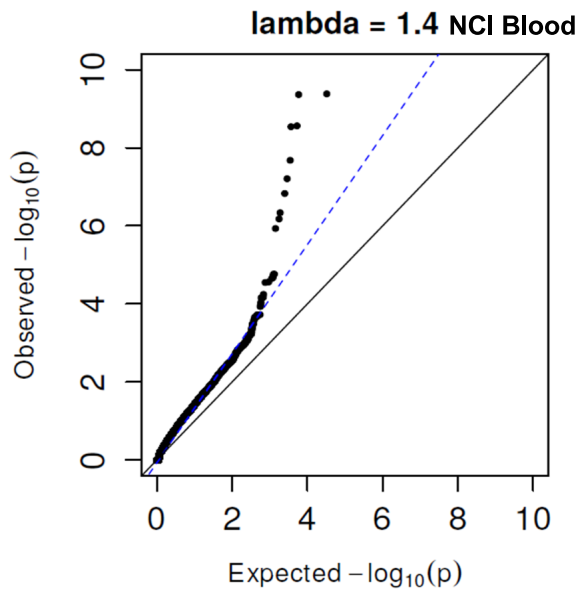**b****COL14A1**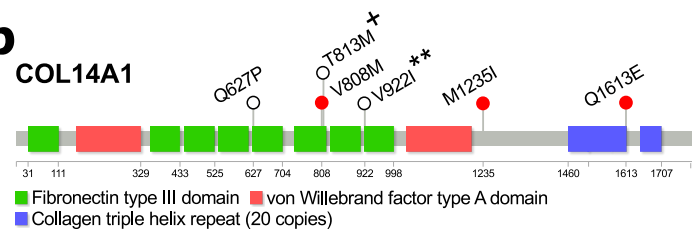**FCGBP**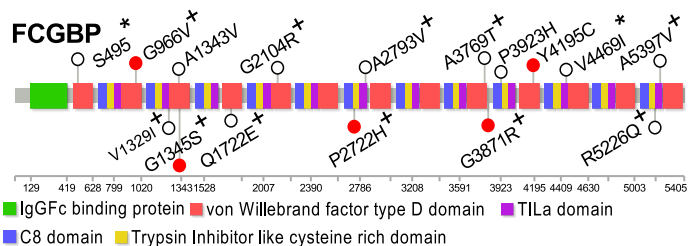**CELSR2**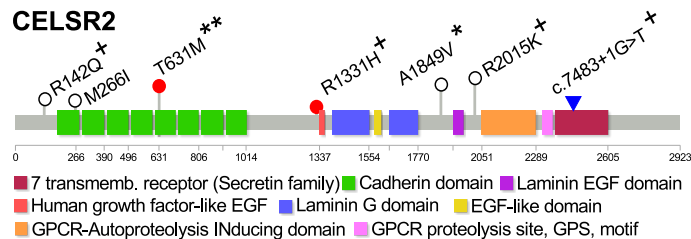**CUBN**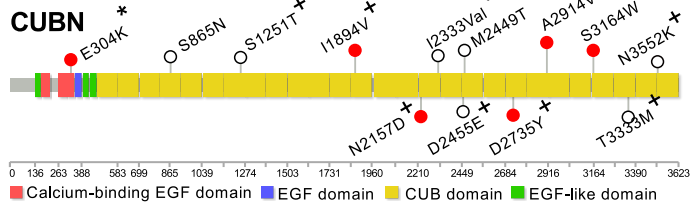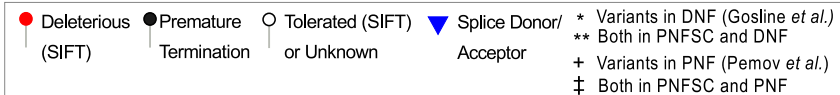

**a**

| Gene Symbol | # of PNFS tumor with |    |     | PNFS<br>% NF1 patients with variants | DNF<br><i>Gosline et al</i><br>% NF1 patients with variants | PNF<br><i>Pemov et al</i><br>% NF1 patients with variants | COSMIC % with mutations |
|-------------|----------------------|----|-----|--------------------------------------|-------------------------------------------------------------|-----------------------------------------------------------|-------------------------|
|             | I                    | II | III |                                      |                                                             |                                                           |                         |
| DMXL2       |                      |    | 3   | 33                                   | 8                                                           |                                                           | 3.2                     |
| FREM2       |                      |    | 3   | 33                                   |                                                             |                                                           | 5.0                     |
| AMOT        |                      |    | 3   | 33                                   |                                                             |                                                           | 0.7                     |
| DOCK1       |                      |    | 3   | 33                                   |                                                             |                                                           | 4.9                     |
| DOCK10      |                      |    | 3   | 33                                   |                                                             | 5                                                         | 4.4                     |
| ESRRB       |                      |    | 3   | 33                                   |                                                             |                                                           | 0.7                     |
| GPC4        |                      |    | 3   | 33                                   |                                                             |                                                           | 1.8                     |
| HMCN1       |                      |    | 3   | 33                                   |                                                             |                                                           | 9.5                     |
| MDN1        |                      |    | 3   | 33                                   |                                                             | 5                                                         | 4.3                     |
| PPP2R3A     |                      |    | 3   | 33                                   |                                                             |                                                           | 2.1                     |
| PTPRS       |                      |    | 3   | 33                                   |                                                             |                                                           | 2.1                     |
| SLC4A7      |                      |    | 3   | 33                                   |                                                             |                                                           | 1.5                     |
| AGAP2       |                      |    | 2   | 22                                   |                                                             |                                                           | 0.8                     |
| DENND2C     |                      |    | 2   | 22                                   |                                                             |                                                           | 1.2                     |
| ITGB8       |                      |    | 2   | 22                                   |                                                             |                                                           | 2.0                     |
| KIAA1432    |                      |    | 2   | 22                                   |                                                             |                                                           | 1.7                     |
| MACF1       |                      |    | 2   | 22                                   | 15                                                          |                                                           | 3.9                     |
| MYH9        |                      |    | 2   | 22                                   | 8                                                           |                                                           | 2.5                     |
| PHOSPHO1    |                      |    | 2   | 22                                   |                                                             |                                                           | 0.1                     |
| RNF213      |                      |    | 2   | 22                                   |                                                             |                                                           | 2.4                     |
| RREB1       |                      |    | 2   | 22                                   |                                                             | 5                                                         | 1.3                     |
| SCN10A      |                      |    | 2   | 22                                   |                                                             |                                                           | 3.9                     |

### III Somatic Only Variants

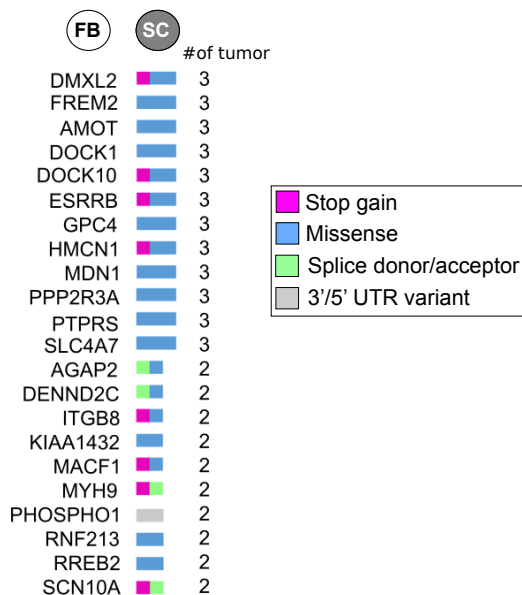**b**

### Somatic Variants

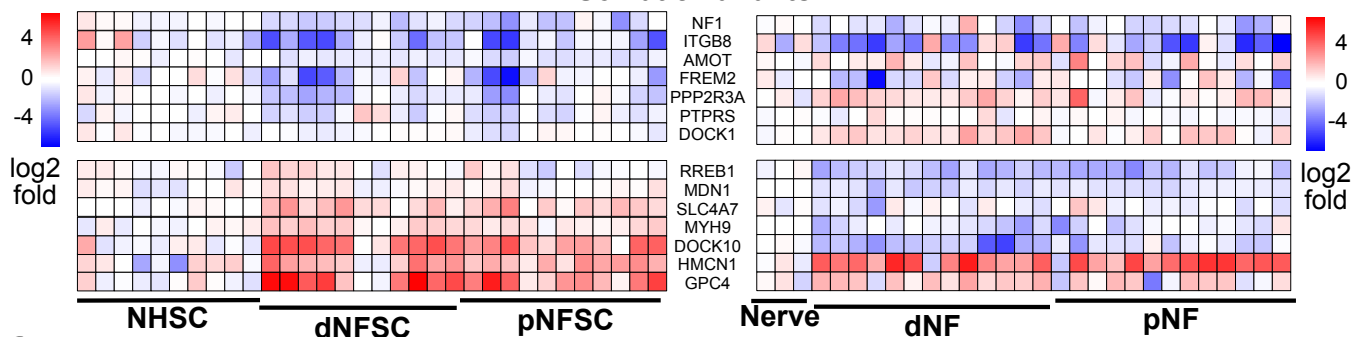**c**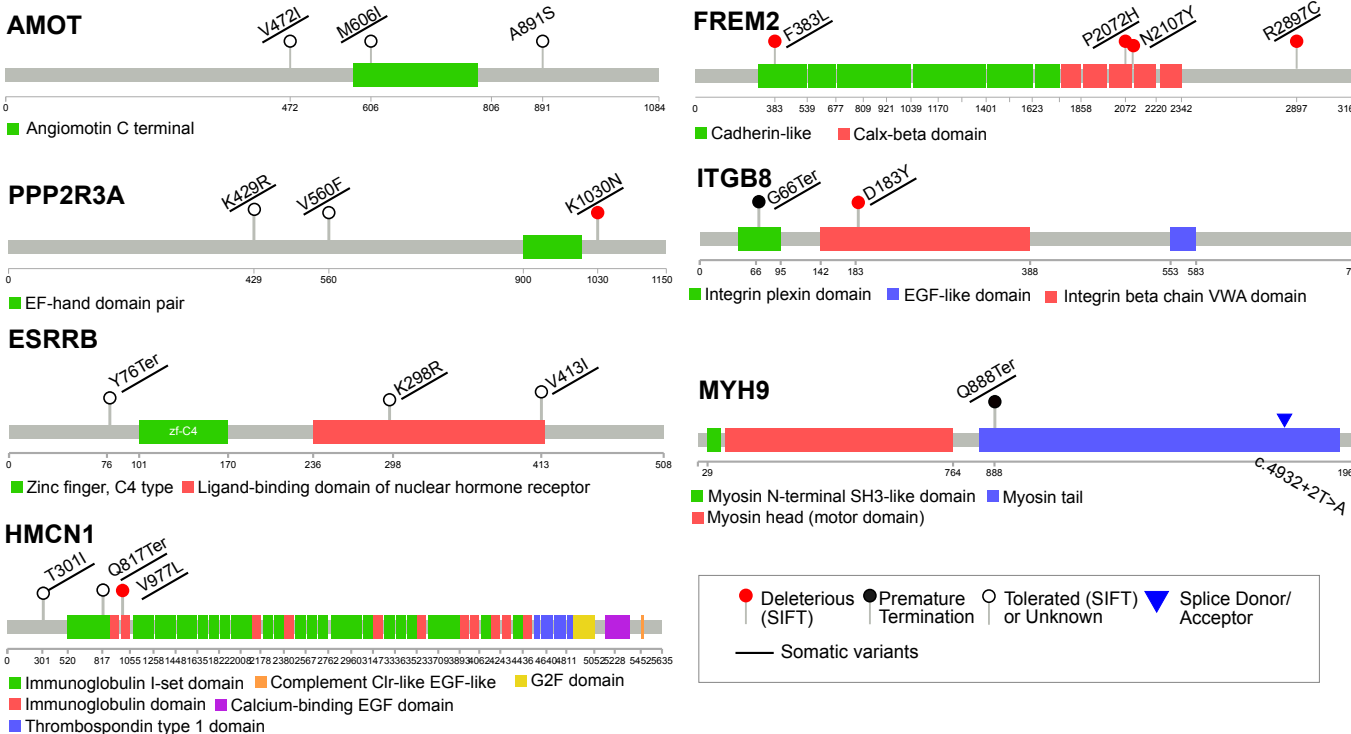

**a**

| Gene Symbol | # of PNF tumors with |    |     | % NF1 patients with variants in PNF | % NF1 patients with variants in syn4984604 DNF |
|-------------|----------------------|----|-----|-------------------------------------|------------------------------------------------|
|             | I                    | II | III |                                     |                                                |
| NF1         | 8                    | 0  | 1   | 100                                 | 31                                             |
| OBSCN       | 1                    | 5  | 1   | 78                                  | 39                                             |
| PKHD1L1     | 2                    | 3  | 1   | 67                                  | 39                                             |

**b**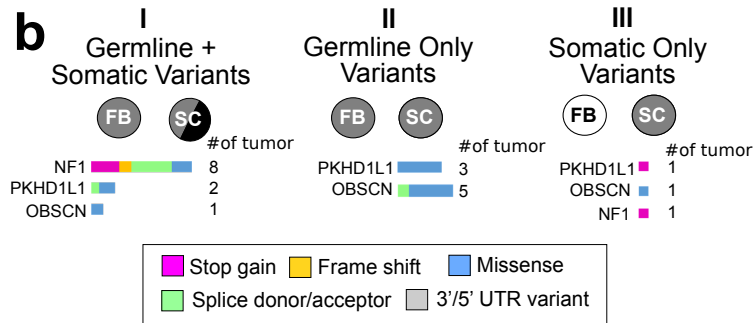**c**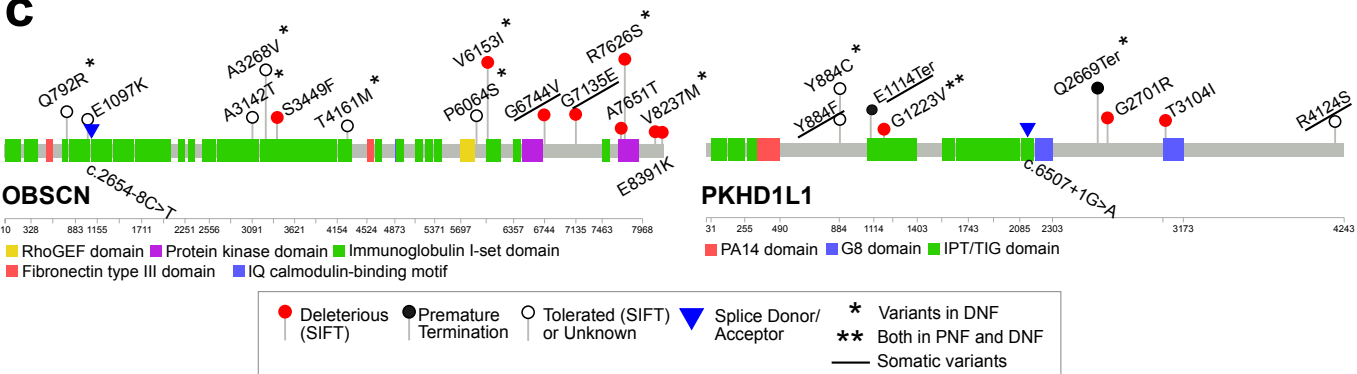

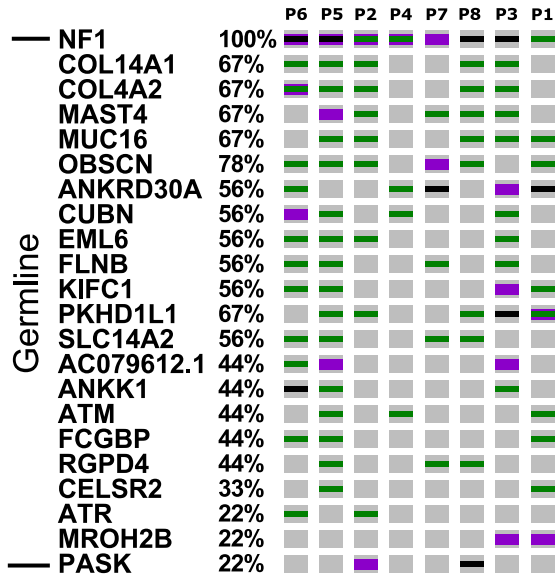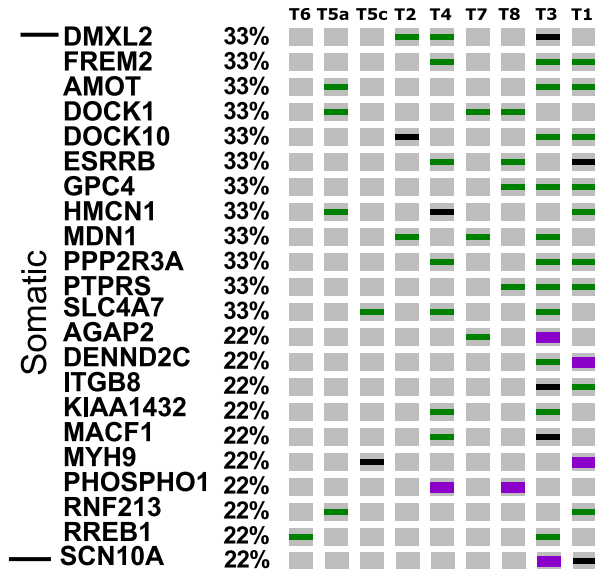

**Genetic Alteration**

- Splicing Mutation
- Truncating Mutation
- Missense Mutation

## Detailed Description of ATM genomic Variants in neurofibromas

| Gene Symbol                    | Variants HGVS                   | Variant sample           | Found in A-T Patients | Found in Breast Cancer                                 | Found in Other Cancer type(s)                           | # of Datasets Predicted as Damaging                             | Known effects on Protein function or Tumorigenesis                                                                      | Reference (PMID)                       |
|--------------------------------|---------------------------------|--------------------------|-----------------------|--------------------------------------------------------|---------------------------------------------------------|-----------------------------------------------------------------|-------------------------------------------------------------------------------------------------------------------------|----------------------------------------|
| <b>ATM</b>                     | ENSP00000278616.4 :p.Ser49Cys   | PNF( This study & PemoV) | Y                     | Y                                                      | Y(Melonoma, Prostate cancer and oropharyngeal cancer)   | 3                                                               | May be breast cancer susceptibility allele; associated with other types of cancers; undertermined for protein function. | 16652348; 18565893; 8665503; 10534763  |
|                                | ENSP00000278616.4 :p.Phe858Leu  | PNF(This study)          | Y                     | Y                                                      | Y(Lymphoma)                                             | 2                                                               | Increased risk for breast cancer development; no known risk for other cancers. May associate with LOH in breast cancer. | 8797579; 10534763; 20826828; 12149228  |
|                                | ENSP00000278616.4 :p.Gly2023Arg | PNF(This study)          | Y                     | Y                                                      | Y(Lymphoma)                                             | 6                                                               | Loss of protein expression                                                                                              | 27664052; 12149228; 23091097; 9005288  |
|                                | ENSP00000278616.4 :p.Met1210Val | DNF( Gosline)            | N                     | N                                                      | Y(Liver Cancer)                                         | 3                                                               | Unknown significance                                                                                                    | COSMIC                                 |
|                                | ENSP00000278616.4 :p.Val2079Ile | DNF( Gosline)            | N                     | Y                                                      | N                                                       | 0                                                               | Associated with loss of rare allele                                                                                     | 19781682; 12917204; 8665503            |
|                                | ENSP00000278616.4 :p.Leu2332Pro | DNF( Gosline)            | N                     | N                                                      | N                                                       | 2                                                               | Mutated in FAT domain                                                                                                   | COSMIC; 28492532; 17344846             |
|                                | ENSP00000278616.4 :p.Phe627Cys  | PNF(PemoV)               | N                     | Y                                                      | N                                                       | 3                                                               | Unknown significance                                                                                                    | COSMIC; 28492532; 19781682             |
|                                | ENSP00000278616.4 :p.Ala740Thr  | PNF(PemoV)               | N                     | N                                                      | N                                                       | 7                                                               | Unknown significance                                                                                                    | N/A                                    |
|                                | ENSP00000278616.4 :p.Thr2333Lys | PNF(PemoV)               | N                     | N                                                      | N                                                       | 1                                                               | Mutated in FAT domain                                                                                                   | COSMIC; ClinVar; 28492532              |
|                                | ENSP00000278616.4 :p.Cys2464Arg | PNF(PemoV)               | N                     | Y                                                      | Y(Chronic Lymphocytic Leukemia, colorectal carcinomas ) | 3                                                               | Doesn't interfere with ATM kinase function                                                                              | 19781682; 17344846; 11805335; 27756406 |
| ENSP00000278616.4 :p.Ser707Pro | PNF(PemoV)                      | N                        | Y                     | Y(Lymphoma, Thyroid or endocrine cancers, Lung cancer) | 0                                                       | Associated with increased risk of thyroid or endocrine cancers. | 27413114; 18164969; 20826828                                                                                            |                                        |

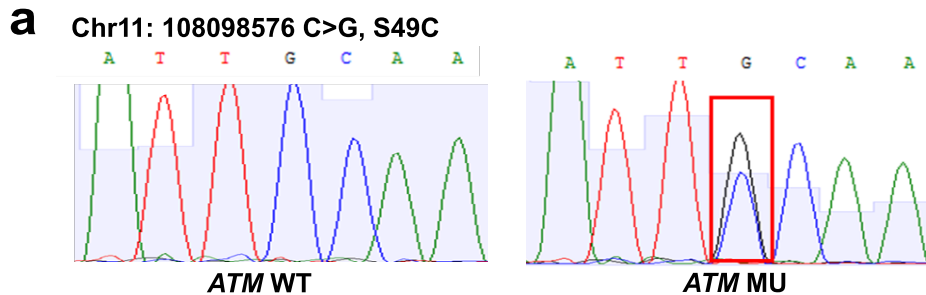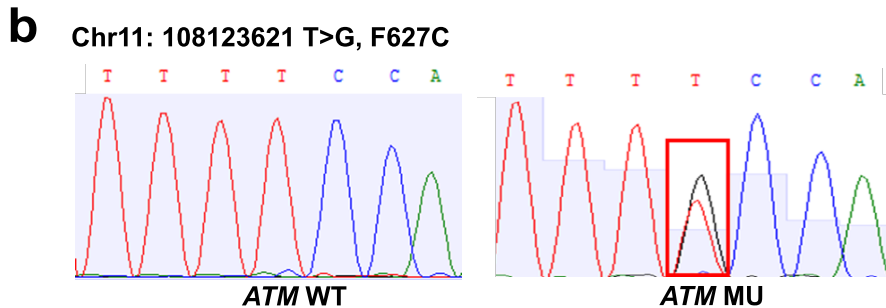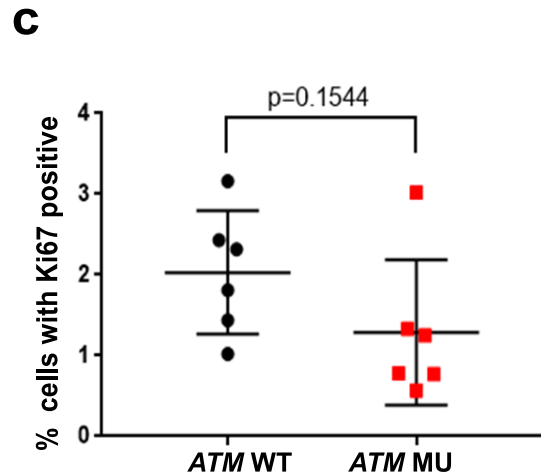



**a****Atm G2023R**

5' GAGCCAGATAGTTTGTATGGCTGTGGTGGAGGGAAGATGTTACAACCC 3' Human DNA seq  
 5' GAGCCGGACAGCCTGTATGGCTGTGGA GGA GGGAAAATGTTACAACCC 3' Mouse DNA seq  
 E--P--D--S--L--Y--G--C--G--G--G--K--M--L--Q--P-- AA sequence

gRNA sequence GCCTGTATGGCTGTGGAGGA

Donor DNA sequence 3' --GCCTGTATGGT T GCGGGA GA --- 5' ~100nt total length

**Atm S707P**

5' AATTACTCATCTGAGATTACA 3' Human DNA seq

5' AATTACTCT T CTGAGATTACA 3' Mouse DNA seq

N--Y--S--S--E--I--T-- AA sequence

gRNA sequence TTTAAGTAATTACTCTTCTGAGG

Donor DNA sequence 3' --CTTAAGCAACTAT T TCTCTGAGG --- 5' ~100nt total length

█ Variant site █ PAM site █ Green Text Wobbled DNA Sequence --- Homology Arm █ Blue Text Next Exon

**b**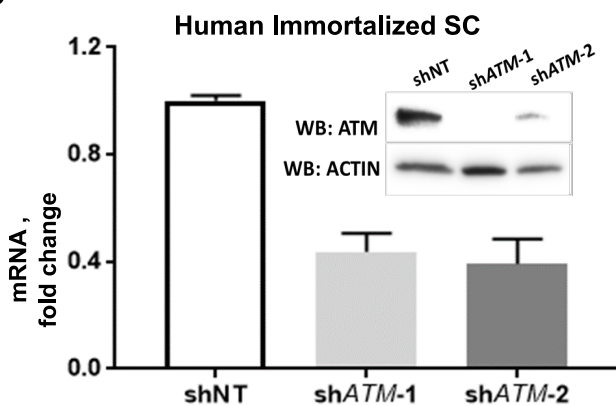**c**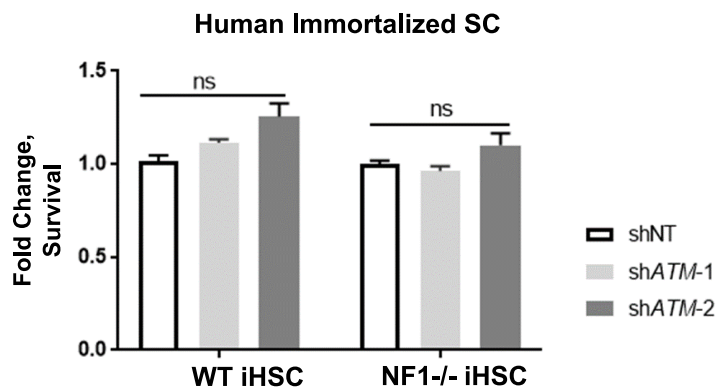**d**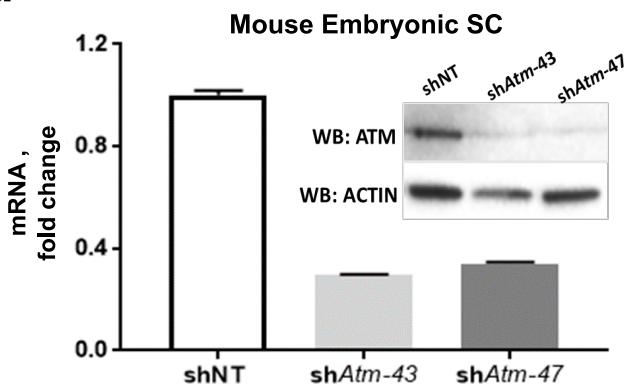**e**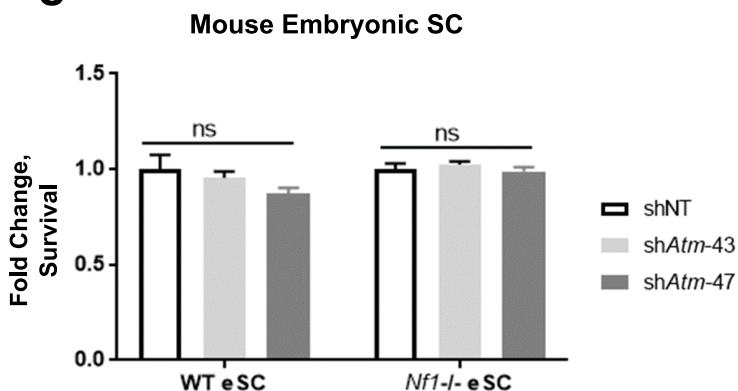

**a****H&E****S100****Toluidine blue***Nf1 fl/fl; DhhCre*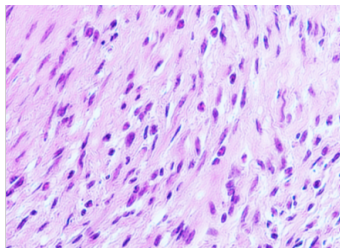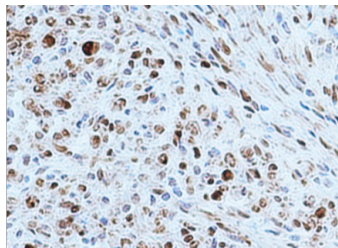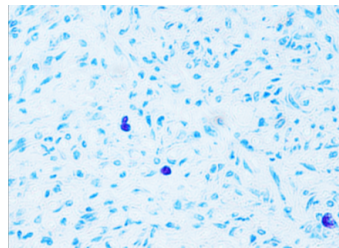*Atm +/-; Nf1 fl/fl;**DhhCre*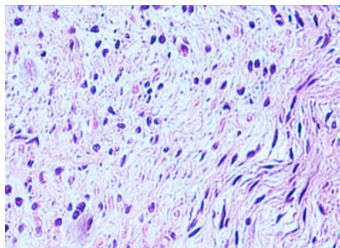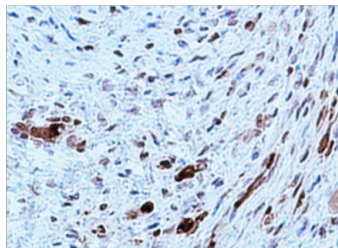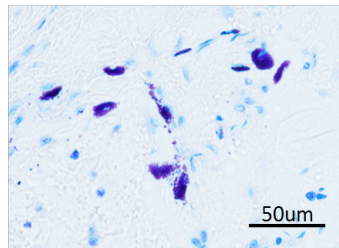**b**

Toluidine blue+ cells/HPF

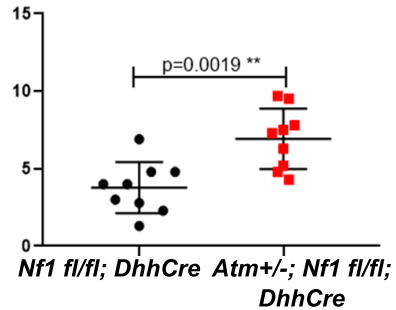

**Supplementary Table 1. Each sample's depth of coverage.**

| GATK coverage info |                    |                    |
|--------------------|--------------------|--------------------|
|                    | Fibroblast         | Schwann cell       |
| Sample             | *Depth of Coverage | *Depth of Coverage |
| T1                 | 79.2               | 75.4               |
| T2                 | 82.8               | 100.8              |
| T3                 | 50.5               | 59.9               |
| T4                 | 98.4               | 80.2               |
| T5a                | 118.6              | 117.2              |
| T5c                | 101.9              | 143.8              |
| T6                 | 101.5              | 128.9              |
| T7                 | 122.2              | 111.0              |
| T8                 | 149.8              | 152.6              |
| P9                 |                    | 97.4               |
| <b>Mean</b>        | 100.6              | 106.7              |
| <b>Max.</b>        | 149.8              | 152.6              |
| <b>Min.</b>        | 50.5               | 59.9               |

\*Sum of the sample specific depth in all loci divided by interval size

| Supplementary Table 2 NF1 gene Germline and somatic mutation status in different NF1 patients--Extended |                      |               |               |                     |          |           |                      |                                     |                                    |                     |                  |            |            | Variants with deleterious, damaging, and/or pathogenic effect (see Suppl. Table 9) |                                      |                 |                   |             |        |         |
|---------------------------------------------------------------------------------------------------------|----------------------|---------------|---------------|---------------------|----------|-----------|----------------------|-------------------------------------|------------------------------------|---------------------|------------------|------------|------------|------------------------------------------------------------------------------------|--------------------------------------|-----------------|-------------------|-------------|--------|---------|
| sample                                                                                                  | position (Chr. site) | Ref. Genotype | Mut. Genotype | Effect              | HGMD ID  | Cell type | Status               | Reads with reference allele (FB/SC) | Reads with mutation allele (FB/SC) | % of mutation reads | GMAF/ ExAC MAF   | 1000Gp1_AC | COSMIC_ID  | HGVSc                                                                              | HGVSp                                | ClinVar disease | ClinVar           | SIFT        | MetaLR | MetaSVM |
| T1                                                                                                      | 17:29652983          | A             | T             | stop gained         |          | FB/sc     | germline             | 42/53                               | 48/52                              | 53/50               |                  |            |            | ENST00000358273.4:c.4981A>T                                                        | ENSP00000351015.4:p.Lys1661Ter       |                 | -                 |             | -      | -       |
|                                                                                                         | 17:29664575          | C             | G             | missense            |          | SC        | somatic              | 79                                  | 37                                 | 47                  |                  |            |            | ENST00000358273.4:c.6617C>G                                                        | ENSP00000351015.4:p.Thr2206Arg       |                 | -                 | deleterious | T      | T       |
|                                                                                                         | 17:29664862          | G             | T             | missense            |          | SC        | somatic              | 41                                  | 4                                  | 9                   |                  |            |            |                                                                                    |                                      |                 | -                 | deleterious | T      | T       |
| T2                                                                                                      | 17:29562746          | C             | G             | missense            | CM040785 | FB/SC     | germline             | 35/33                               | 36/34                              | 51/51               |                  |            |            | ENST00000358273.4:c.3826C>G                                                        | ENSP00000351015.4:p.Arg1276Gly       | NF1             | pathogenic        | deleterious | D      | D       |
|                                                                                                         | 17:29509674          | CATGAATAAG    | C             | splicing            |          | SC        | somatic              | 35                                  | 7                                  | 16                  |                  |            |            | ENST00000358273.4:c.881_888+4delTGAATAAGGTAA                                       |                                      |                 | -                 |             | -      |         |
|                                                                                                         | 17:29677252          | GTA           | T             | missense            |          | SC        | somatic              | 117                                 | 6                                  | 5                   |                  |            |            |                                                                                    |                                      |                 | -                 | deleterious | T      | T       |
| T3                                                                                                      | 17:29457003          | C             | T             | stop gained         | CM000774 | SC        | somatic              | 52                                  | 13                                 | 25                  | 0.00008238       |            | COSM42794  | ENST00000358273.4:c.574C>T                                                         | ENSP00000351015.4:p.Arg192Ter        | NF1             | pathogenic        |             |        | -       |
| T4                                                                                                      | 17:29585518          | A             | G             | missense            |          | FB        | germline             | 79/44                               | 61/39                              | 44/47               | 8.24E-06         |            | COSM24576  | ENST00000358273.4:c.4330A>G                                                        | ENSP00000351015.4:p.Lys1444Glu       | NF1             | pathogenic        | deleterious | D      | D       |
| T5a                                                                                                     | 17:29483145          | G             | A             | splicing            |          | FB        | germline             | 109/136                             | 116/109                            | 51/44               |                  |            |            | ENST00000358273.4:c.204-1G>A                                                       |                                      |                 | likely pathogenic |             | -      |         |
|                                                                                                         | 17:29533315          | C             | T             | stop gained         | CM000780 | SC        | somatic              | 192                                 | 85                                 | 44                  | 8.24E-06         |            | COSM977403 | ENST00000358273.4:c.1318C>T                                                        | ENSP00000351015.4:p.Arg440Ter        | NF1             | pathogenic        |             |        | -       |
| T5c                                                                                                     | 17:29483145          | G             | A             | splicing            |          | FB        | germline             | 118/210                             | 130/118                            | 52/36               |                  |            |            | ENST00000358273.4:c.204-1G>A                                                       |                                      |                 | pathogenic        |             | -      |         |
|                                                                                                         | 17:29562641          | C             | T             | stop gained         | CM000799 | SC        | somatic              | 191                                 | 32                                 | 14                  |                  |            | COSM24441  | ENST00000358273.4:c.3721C>T                                                        | ENSP00000351015.4:p.Arg1241Ter       | NF1             | pathogenic        |             |        | -       |
| T6                                                                                                      | 17:29560021          | C             | T             | splicing/synonymous |          | FB        | germline             | 41/12                               | 29/46                              | 41/79               | 0.0044/1.244E-03 |            |            | ENST00000358273.4:c.3498C>T                                                        | ENST00000358273.4:c.3498C>T(p.%3D)   | NF1             |                   |             |        | -       |
|                                                                                                         | 17:29546122          | C             | T             | stop gained         | CM020463 | SC        | somatic              | 74                                  | 20                                 | 21                  |                  |            |            | ENST00000358273.4:c.1627C>T                                                        | ENSP00000351015.4:p.Gln543Ter        |                 | -                 |             |        | -       |
| T7                                                                                                      | 17:29556143          | G             | A             | stop gained         | CM076345 | SC        | somatic              | 41                                  | 8                                  | 16                  |                  |            |            | ENST00000358273.4:c.2510G>A                                                        | ENSP00000351015.4:p.Trp837Ter        |                 | -                 |             |        | -       |
|                                                                                                         | 17:29557401          | G             | A             | splicing            |          | FB        | germline             | 42/0                                | 34/67                              | 45/100              |                  |            |            | ENST00000358273.4:c.3113+1G>A                                                      |                                      | NF1             | pathogenic        |             |        | -       |
| T8                                                                                                      | 17:29677208          | T             | TA            | frame shift         |          | SC        | germline and somatic | 0                                   | 67                                 | 100                 |                  |            |            |                                                                                    |                                      | NF1             | pathogenic        |             |        | -       |
|                                                                                                         | 17:29562709          | AG            | A             | frame shift         |          | SC        | somatic              | 272/276                             | 104/116                            | 28/30               |                  |            |            | ENST00000358273.4:c.7330dupA                                                       | ENSP00000351015.4:p.Thr2444AsnfsTer4 |                 | -                 |             |        | -       |
|                                                                                                         |                      |               |               |                     |          |           |                      | 147                                 | 73                                 | 50                  |                  |            |            | ENST00000358273.4:c.3790delG                                                       | ENSP00000351015.4:p.Glu1264LysfsTer2 |                 | -                 |             |        | -       |

End note: Highlighted sites are recurrent mutation with same site on same gene in different PNF (Ratner), DNF (Gosline) and PNF (Pemov) samples

Yellow: Overlapped mutated sites between PNF (Ratner) and DNF (Gosline)

Green: Overlapped mutated sites between PNF (Ratner) and PNF (Pemov)



Supplementary Table 3: Top 22 germline variant genes

| SYMBOL   | CHR | POS       | Sample # | Ref                 | Alt                         | Consequences                 | HGVS                        | HGVS_p                        | GMAF      | ExAC_MAF    | 1000Gp1_A C allele counts in | ExAC_A C allele counts in | INFO                        | Reads with reference          | Reads with mutation           | Mutation reads Ratio(FB)    | Reads with allele(SC)       | Reads with mutation(SC) | Mutation Ratio(SC) | ClinVar (2019) | SIFT       | MetaLR                            | MetaSVM                      | Variants with deleterious, damaging, and/or pathogenic effect (see Suppl. Table 6) |             |                   |             |            |                            |                               |               |             |     |    |     |            |             |             |            |             |   |   |
|----------|-----|-----------|----------|---------------------|-----------------------------|------------------------------|-----------------------------|-------------------------------|-----------|-------------|------------------------------|---------------------------|-----------------------------|-------------------------------|-------------------------------|-----------------------------|-----------------------------|-------------------------|--------------------|----------------|------------|-----------------------------------|------------------------------|------------------------------------------------------------------------------------|-------------|-------------------|-------------|------------|----------------------------|-------------------------------|---------------|-------------|-----|----|-----|------------|-------------|-------------|------------|-------------|---|---|
|          |     |           |          |                     |                             |                              |                             |                               |           |             |                              |                           |                             |                               |                               |                             |                             |                         |                    |                |            |                                   |                              | Likely_pathogenic                                                                  | Pathogenic  |                   |             |            |                            |                               |               |             |     |    |     |            |             |             |            |             |   |   |
| NF1      | 17  | 2965283   | T1       | A                   | T                           | stop_gained                  | ENST00000358273.4:c.4981A>T | ENSP0000035105.4p.Lys1461Ter  | -         | -           | -                            | -                         | -                           | 42                            | 48                            | 53%                         | 53                          | 52                      | 50%                |                |            |                                   |                              |                                                                                    |             |                   |             |            |                            |                               |               |             |     |    |     |            |             |             |            |             |   |   |
|          |     |           |          |                     |                             |                              |                             |                               | 29652746  | G           | C                            | missense_variant          | ENST00000358273.4:c.4826C>G | ENSP0000035105.4p.Arg1276Gly  | -                             | -                           | 1                           | 1                       | 100%               | 35             | 36         | 51%                               | 33                           | 34                                                                                 | 51%         | Likely_pathogenic | deleterious | -          | -                          | D                             | D             |             |     |    |     |            |             |             |            |             |   |   |
|          |     |           |          |                     |                             |                              |                             |                               | 29655518  | G           | A                            | missense_variant          | ENST00000358273.4:c.4388A>C | ENSP0000035105.4p.Arg1444Glu  | A:0.00000824                  | -                           | -                           | -                       | -                  | 63             | 63         | 44%                               | 44                           | 39                                                                                 | 44%         | 44                | 39          | 44%        | Pathogenic                 | deleterious                   | -             | -           | D   | D  |     |            |             |             |            |             |   |   |
|          |     |           |          |                     |                             |                              |                             |                               | 29483145  | T5a         | G                            | A                         | splice_donor_variant        | ENST00000358273.4:c.204-16GA  | -                             | -                           | -                           | -                       | -                  | -              | 116        | 109                               | 48%                          | 109                                                                                | 136         | 55%               | Pathogenic  | -          | -                          | -                             | -             | -           | -   |    |     |            |             |             |            |             |   |   |
|          |     |           |          |                     |                             |                              |                             |                               | 29483145  | T5a         | G                            | A                         | splice_donor_variant        | ENST00000358273.4:c.204-16GA  | -                             | -                           | -                           | -                       | -                  | -              | 116        | 109                               | 48%                          | 109                                                                                | 136         | 55%               | Pathogenic  | -          | -                          | -                             | -             | -           | -   |    |     |            |             |             |            |             |   |   |
| COL14A1  | 8   | 121354634 | T2       | C                   | G                           | missense_variant             | ENST00000297848.3:c.4837C>G | ENSP00000297848.3p.Arg1613Glu | G:0.0014  | G:1.581e-03 | 3                            | 192                       | 192                         | r140154122                    | 95                            | 123                         | 56%                         | 53                      | 52                 | 50%            |            |                                   |                              |                                                                                    |             |                   |             |            |                            |                               |               |             |     |    |     |            |             |             |            |             |   |   |
|          |     |           |          |                     |                             |                              |                             |                               | 121325981 | T1          | C                            | missense_variant          | ENST00000297848.3:c.4898A>C | ENSP00000297848.3p.Arg1627Tyr | C:0.0002                      | C:1.002e-03                 | 17                          | 129                     | 129                | r1116691414    | 96         | 23                                | 28%                          | 65                                                                                 | 44          | 28%               | 44          | 39         | 47%                        | Pathogenic                    | deleterious   | -           | -   | D  | D   |            |             |             |            |             |   |   |
|          |     |           |          |                     |                             |                              |                             |                               | 121325981 | T5a         | G                            | A                         | missense_variant            | ENST00000297848.3:c.2764G>A   | ENSP00000297848.3p.Arg1202Gln | A:0.0028                    | A:3.2e-07                   | 10                      | 837                | 837            | r111774228 | 79                                | 42                           | 35%                                                                                | 79          | 42                | 35%         | Pathogenic | deleterious                | -                             | -             | D           | D   |    |     |            |             |             |            |             |   |   |
|          |     |           |          |                     |                             |                              |                             |                               | 121293179 | T5a         | G                            | A                         | missense_variant            | ENST00000297848.3:c.3705G>A   | ENSP00000297848.3p.Met1235Ile | -                           | -                           | -                       | -                  | -              | 968        | 102                               | 51%                          | 109                                                                                | 71          | 26%               | 46%         | 79%        | Pathogenic                 | deleterious                   | -             | -           | D   | D  |     |            |             |             |            |             |   |   |
|          |     |           |          |                     |                             |                              |                             |                               | 121267490 | T5c         | G                            | A                         | missense_variant            | ENST00000297848.3:c.2764G>A   | ENSP00000297848.3p.Val922Ile  | A:0.0028                    | A:3.27e-03                  | 10                      | 637                | 637            | r111774228 | 57                                | 72                           | 56%                                                                                | 89          | 56                | 39%         | Pathogenic | deleterious                | -                             | -             | D           | D   |    |     |            |             |             |            |             |   |   |
|          |     |           |          |                     |                             |                              |                             |                               | 121293179 | T5c         | G                            | A                         | missense_variant            | ENST00000297848.3:c.3705G>A   | ENSP00000297848.3p.Met1235Ile | -                           | -                           | -                       | -                  | -              | 968        | 102                               | 51%                          | 109                                                                                | 71          | 26%               | 46%         | 79%        | Pathogenic                 | deleterious                   | -             | -           | D   | D  |     |            |             |             |            |             |   |   |
|          |     |           |          |                     |                             |                              |                             |                               | 121256190 | T6          | G                            | A                         | missense_variant            | ENST00000297848.3:c.2425A>G   | ENSP00000297848.3p.Val808Met  | A:0.0004                    | A:3.765e-05                 | 7                       | 129                | 129            | r115766614 | 40                                | 67                           | 60%                                                                                | 53          | 29                | 38%         | 38%        | 42%                        | Pathogenic                    | deleterious   | -           | -   | D  | D   |            |             |             |            |             |   |   |
|          |     |           |          |                     |                             |                              |                             |                               | 121293179 | T6          | G                            | A                         | missense_variant            | ENST00000297848.3:c.3705G>A   | ENSP00000297848.3p.Met1235Ile | -                           | -                           | -                       | -                  | -              | 968        | 102                               | 51%                          | 109                                                                                | 71          | 26%               | 46%         | 79%        | Pathogenic                 | deleterious                   | -             | -           | D   | D  |     |            |             |             |            |             |   |   |
|          |     |           |          |                     |                             |                              |                             |                               | 111118382 | T3          | G                            | A                         | missense_variant            | ENST00000360467.5:c.2016G>A   | ENSP00000360467.5p.Ile85Val   | A:0.0012                    | A:5.954e-04                 | 4                       | 72                 | 72             | r143710874 | 99                                | 95                           | 49%                                                                                | 198         | 144               | 42%         | 42%        | 49%                        | Pathogenic                    | deleterious   | -           | -   | D  | D   |            |             |             |            |             |   |   |
|          |     |           |          |                     |                             |                              |                             |                               | 111114695 | T3a         | T                            | A                         | missense_variant            | ENST00000360467.5:c.1740T>A   | ENSP00000360467.5p.Arg500Glu  | -                           | -                           | -                       | -                  | -              | 1          | 30                                | 30                           | 50%                                                                                | 43          | 49                | 59%         | 54         | 49                         | 59%                           | Pathogenic    | deleterious | -   | -  | D   | D          |             |             |            |             |   |   |
|          |     |           |          |                     |                             |                              |                             |                               | 111114695 | T3a         | T                            | A                         | missense_variant            | ENST00000360467.5:c.1740T>A   | ENSP00000360467.5p.Arg500Glu  | -                           | -                           | -                       | -                  | -              | 1          | 30                                | 30                           | 50%                                                                                | 43          | 49                | 59%         | 54         | 49                         | 59%                           | Pathogenic    | deleterious | -   | -  | D   | D          |             |             |            |             |   |   |
|          |     |           |          |                     |                             |                              |                             |                               | 111155479 | T6          | C                            | T                         | missense_variant            | ENST00000360467.5:c.3889C>T   | ENSP00000360467.5p.Arg1295Tyr | T:0.0006                    | T:1.821e-04                 | 2                       | 22                 | 22             | r187356494 | 27                                | 14                           | 27%                                                                                | 12          | 16                | 57%         | 12         | 16                         | 57%                           | Likely_benign | -           | -   | -  | -   | -          |             |             |            |             |   |   |
|          |     |           |          |                     |                             |                              |                             |                               | 111154563 | T6          | T                            | C                         | 3_prime_UTR_variant         | ENST00000360467.5:*25T>C      | C:0.0088                      | C:2.905e-03                 | 2                           | 22                      | 22                 | r113311483     | 27         | 14                                | 27%                          | 12                                                                                 | 16          | 57%               | 12          | 16         | 57%                        | Likely_benign                 | -             | -           | -   | -  | -   |            |             |             |            |             |   |   |
|          |     |           |          |                     |                             |                              |                             |                               | 111143601 | T8          | A                            | G                         | missense_variant            | ENST00000360467.5:c.3388A>G   | ENSP00000360467.5p.Glu1230Val | G:0.0058                    | G:7.829e-03                 | 18                      | 945                | 945            | r111741802 | 79                                | 75                           | 49%                                                                                | 87          | 59                | 40%         | 40%        | 49%                        | Pathogenic/Likely_benign_risk | deleterious   | -           | -   | D  | D   |            |             |             |            |             |   |   |
|          |     |           |          |                     |                             |                              |                             |                               | MAST4     | 5           | 6641069                      | T2                        | G                           | A                             | missense_variant              | ENST00000436623.2:c.2956G>A | ENSP0000038727.1p.Glu868Ile | A:0.0036                | A:9.205e-03        | 7              | 114        | 114                               | r55969676                    | 33                                                                                 | 25          | 43%               | 36          | 38         | 51%                        | Pathogenic                    | deleterious   | -           | -   | D  | D   |            |             |             |            |             |   |   |
| 6641391  | T3  | G         | C        | missense_variant    | ENST00000436623.2:c.6948G>C | ENSP0000038727.1p.Arg1285Ser | C:0.0002                    | A:2.295e-08                   |           |             |                              |                           |                             |                               |                               |                             |                             | 1                       | 9                  | 202            | r77191584  | 16                                | 31                           | 66%                                                                                | 55          | 29                | 35%         | Pathogenic | deleterious_low_confidence | -                             | -             | D           | D   |    |     |            |             |             |            |             |   |   |
| 6642049  | T3  | G         | C        | missense_variant    | ENST00000436623.2:c.7394G>C | ENSP0000038727.1p.Arg1293Tyr | G:0.0052                    | G:4.432e-03                   |           |             |                              |                           |                             |                               |                               |                             |                             | 6                       | 172                | 172            | r533802014 | 39                                | 17                           | 30%                                                                                | 47          | 24                | 42%         | Pathogenic | deleterious_low_confidence | -                             | -             | D           | D   |    |     |            |             |             |            |             |   |   |
| 6589245  | T5a | C         | A        | 5_prime_UTR_variant | ENST00000436623.2:c.39C>A   | A:0.0002                     | A:4.756e-04                 | 1                             |           |             |                              |                           |                             |                               |                               |                             |                             | 8                       | 8                  | -              | 11         | 11                                | 50%                          | 4                                                                                  | 6           | 60%               | 4           | 6          | 60%                        | Pathogenic                    | deleterious   | -           | -   | D  | D   |            |             |             |            |             |   |   |
| 6589245  | T5c | C         | A        | 5_prime_UTR_variant | ENST00000436623.2:c.39C>A   | A:0.0002                     | A:4.756e-04                 | 1                             |           |             |                              |                           |                             |                               |                               |                             |                             | 8                       | 8                  | -              | 8          | 3                                 | 27%                          | 10                                                                                 | 11          | 52%               | 10          | 11         | 52%                        | Pathogenic                    | deleterious   | -           | -   | D  | D   |            |             |             |            |             |   |   |
| MUC16    | 19  | 9046071   | T1       | C                   | T                           | missense_variant             | ENST00000397910.2:c.2445A>G | ENSP0000038727.1p.Arg1308Gly  | T:0.0006  | T:2.482e-05 | 12                           | 15                        | 15                          | r201605728                    | 82                            | 78                          | 49%                         | 43                      | 45                 | 43%            | Pathogenic | deleterious                       | -                            | -                                                                                  | D           | D                 |             |            |                            |                               |               |             |     |    |     |            |             |             |            |             |   |   |
|          |     |           |          |                     |                             |                              |                             |                               | 9065094   | T2          | T                            | C                         | missense_variant            | ENST00000397910.2:c.2235T>G   | ENSP0000038727.1p.Arg1389Gln  | C:0.0006                    | C:1.389e-03                 | 6                       | 87                 | 87             | r115107458 | 40                                | 39                           | 40%                                                                                | 42          | 52                | 52%         | Pathogenic | deleterious                | -                             | -             | D           | D   |    |     |            |             |             |            |             |   |   |
|          |     |           |          |                     |                             |                              |                             |                               | 9096341   | T3          | G                            | A                         | missense_variant            | ENST00000397910.2:c.1908S>C   | ENSP0000038727.1p.Arg1302Cys  | A:0.0086                    | A:2.655e-03                 | 11                      | 321                | 321            | r115200029 | 381                               | 222                          | 37%                                                                                | 584         | 373               | 39%         | Pathogenic | deleterious                | -                             | -             | D           | D   |    |     |            |             |             |            |             |   |   |
|          |     |           |          |                     |                             |                              |                             |                               | 9073300   | T3          | C                            | A                         | missense_variant            | ENST00000397910.2:c.1414G>A   | ENSP0000038727.1p.Arg1476Ser  | A:0.0016                    | A:3.474e-04                 | 3                       | 42                 | 42             | r116257308 | 47                                | 35                           | 43%                                                                                | 69          | 48                | 41%         | Pathogenic | deleterious                | -                             | -             | D           | D   |    |     |            |             |             |            |             |   |   |
|          |     |           |          |                     |                             |                              |                             |                               | 9068983   | T5a         | G                            | T                         | missense_variant            | ENST00000397910.2:c.4832C>A   | ENSP0000038727.1p.Trp1811Ile  | T:0.0010                    | T:2.696e-03                 | 3                       | 328                | 328            | r180451266 | 78                                | 84                           | 48%                                                                                | 90          | 88                | 49%         | Pathogenic | deleterious                | -                             | -             | D           | D   |    |     |            |             |             |            |             |   |   |
|          |     |           |          |                     |                             |                              |                             |                               | 9068983   | T5a         | G                            | T                         | missense_variant            | ENST00000397910.2:c.4832C>A   | ENSP0000038727.1p.Trp1811Ile  | T:0.0010                    | T:2.696e-03                 | 3                       | 328                | 328            | r180451266 | 78                                | 84                           | 48%                                                                                | 90          | 88                | 49%         | Pathogenic | deleterious                | -                             | -             | D           | D   |    |     |            |             |             |            |             |   |   |
|          |     |           |          |                     |                             |                              |                             |                               | 9002059   | T8          | T                            | C                         | missense_variant            | ENST00000397910.2:c.4743G>A   | ENSP0000038727.1p.Arg1479Gly  | C:0.0016                    | C:5.691e-03                 | 2                       | 326                | 326            | r120453110 | 117                               | 117                          | 50%                                                                                | 117         | 114               | 48%         | 110        | 110                        | 48%                           | Pathogenic    | deleterious | -   | -  | D   | D          |             |             |            |             |   |   |
|          |     |           |          |                     |                             |                              |                             |                               | 9068458   | T8          | T                            | C                         | missense_variant            | ENST00000397910.2:c.4743G>A   | ENSP0000038727.1p.Arg1479Gly  | T:0.0016                    | T:5.458e-03                 | 4                       | 660                | 660            | r150142305 | 164                               | 168                          | 51%                                                                                | 148         | 154               | 44%         | 144        | 144                        | 44%                           | Pathogenic    | deleterious | -   | -  | D   | D          |             |             |            |             |   |   |
|          |     |           |          |                     |                             |                              |                             |                               | OBSCN     | 1           | 128680779                    | T1                        | G                           | A                             | missense_variant              | ENST0000070156.2:c.2517G>A  | ENSP000005507.2p.Glu831Ile  | A:0.0002                | A:3.439e-04        | 4              | 40         | 40                                | r19907775                    | 4                                                                                  | 10          | 71%               | 5           | 5          | 50%                        | Pathogenic                    | deleterious   | -           | -   | D  | D   |            |             |             |            |             |   |   |
|          |     |           |          |                     |                             |                              |                             |                               |           |             |                              |                           |                             |                               |                               |                             |                             | 22857793                | T2                 | G              | A          | missense_variant                  | ENST0000070156.2:c.2295G>A   | ENSP000005507.2p.Arg763Tyr                                                         | A:0.0024    | A:2.200e-03       | 5           | 272        | 272                        | r145597580                    | 38            | 29          | 34% | 82 | 65  | 44%        | Pathogenic  | deleterious | -          | -           | D | D |
|          |     |           |          |                     |                             |                              |                             |                               |           |             |                              |                           |                             |                               |                               |                             |                             | 22847833                | T5c                | C              | T          | missense_variant                  | ENST0000070156.2:c.1034G>T   | ENSP000005507.2p.Ser449Phe                                                         | A:0.0002    | A:1.632e-04       | 1           | 3          | 3                          | -                             | 31            | 45%         | 39  | 39 | 44% | Pathogenic | deleterious | -           | -          | D           | D |   |
|          |     |           |          |                     |                             |                              |                             |                               |           |             |                              |                           |                             |                               |                               |                             |                             | 228430967               | T6                 | G              | A          | missense_variant                  | ENST0000070156.2:c.3289G>A   | ENSP000005507.2p.Glu1097Tyr                                                        | A:0.0002    | A:1.323e-04       | 1           | 16         | 16                         | -                             | 44            | 34          | 42% | 50 | 54  | 52%        | Pathogenic  | deleterious | -          | -           | D | D |
|          |     |           |          |                     |                             |                              |                             |                               |           |             |                              |                           |                             |                               |                               |                             |                             | 228407017               | T7                 | C              | T          | ice_region_variant&intron_variant | ENST0000070156.2:c.2654-8C>T | T:0.0002                                                                           | T:2.482e-05 | -                 | -           | -          | -                          | 14                            | 11            | 44%         | 4   | 9  | 69% | 4          | 9           | 69%         | Pathogenic | deleterious | - | - |
|          |     |           |          |                     |                             |                              |                             |                               | ANRD30A   | 10          | 3741455                      | T1                        | C                           | T                             | 5_prime_UTR_variant           | ENST0000036171.1:c.29C>T    | ENSP0000034412.1p.Arg78Tyr  | T:0.0084                | T:2.358e-03        | 15             | 34         | 34                                | r74412113                    | 15                                                                                 | 34          | 69%               | 49          | 43         | 47%                        | Pathogenic                    | deleterious   | -           | -   | D  | D   |            |             |             |            |             |   |   |
|          |     |           |          |                     |                             |                              |                             |                               |           |             |                              |                           |                             |                               |                               |                             |                             | 3742294                 | T6                 | A              | G          | missense_variant                  | ENST0000036171.1:c.540A>G    | ENSP0000034412.1p.Ile180Met                                                        | G:0.0002    | G:9.432e-04       | 5           | 114        | 114                        | r190021267                    | 123           | 108         | 47% | 99 | 121 | 55%        | Pathogenic  | deleterious | -          | -           | D | D |
| 3750878  | T1  | CTG       | C        | frameshift_variant  | eITG                        | ENSP0000034412.1p.Ile180Met  | -                           | -                             |           |             |                              |                           |                             |                               |                               |                             |                             | -                       | -                  | -              | -          | -                                 | -                            | -                                                                                  | -           | -                 | -           | -          | -                          | -                             | -             |             |     |    |     |            |             |             |            |             |   |   |
| 37482182 | T7  | AG        | A        | frameshift_variant  | eITG                        | ENSP0000034412.1p.Ile180Met  | -                           | -                             |           |             |                              |                           |                             |                               |                               |                             |                             | -                       | -                  | -              | -          | -                                 | -                            | -                                                                                  | -           | -                 | -           | -          | -                          | -                             | -             | -           |     |    |     |            |             |             |            |             |   |   |
| 16893406 | T3  | G         | C        | missense_variant    | ENST0000037833.4:c.949G>C   | ENSP0000037833.4p.Arg314Tyr  | G:0.0078                    | A:3.295e-06                   |           |             |                              |                           |                             |                               |                               |                             |                             | 10                      | 342                | 342            | r57163341  | 18                                | 20                           | 61%                                                                                | 28          | 31                | 53%         | Pathogenic | deleterious                | -                             | -             | D           | D   |    |     |            |             |             |            |             |   |   |
| CUBN     | 10  | 17112656  | T1       | C                   | T                           | missense_variant             | ENST0000037833.4:c.254A>G   | ENSP0000037833.4p.Arg85Gln    | A:0.0002  | A:3.765e-05 | 1                            | 904                       | 904                         | r113085122                    | 85                            | 101                         | 56%                         | 86                      | 78                 | 48%            | Pathogenic | deleterious                       | -                            | -                                                                                  | D           | D                 |             |            |                            |                               |               |             |     |    |     |            |             |             |            |             |   |   |
|          |     |           |          |                     |                             |                              |                             |                               | 16957036  | T5a         | A                            | G                         | missense_variant            | ENST0000037833.4:c.7344T>C    | ENSP0000037833.4p.Met2449Tyr  | G:0.0034                    | C:3.542e-04                 | 3                       | 529                | 529            | r143101097 | 58                                | 28                           | 33%                                                                                | 68          | 38                | 36%         | Benign     | deleterious                | -                             | -             | D           | D   |    |     |            |             |             |            |             |   |   |
|          |     |           |          |                     |                             |                              |                             |                               | 16957036  | T5c         | A                            | G                         | missense_variant            | ENST0000037833.4:c.7344T>C    | ENSP0000037833.4p.Met2449Tyr  | G:0.0034                    | C:3.542e-04                 | 3                       | 529                | 529            | r143101097 | 47                                | 40                           | 46%                                                                                | 62          | 52                | 46%         | Benign     | deleterious                | -                             | -             | D           | D   |    |     |            |             |             |            |             |   |   |
|          |     |           |          |                     |                             |                              |                             |                               | 168692    |             |                              |                           |                             |                               |                               |                             |                             |                         |                    |                |            |                                   |                              |                                                                                    |             |                   |             |            |                            |                               |               |             |     |    |     |            |             |             |            |             |   |   |

| Supplementary Table 4: Top 25 somatic variant genes |          |           |               |               |                               |                                              |                                |           |                             |                     |                      |               |                                  |                                  |                                |                          | Variants with deleterious, damaging, and/or pathogenic effect (see Suppl. Table 9) |                     |           |         |   |
|-----------------------------------------------------|----------|-----------|---------------|---------------|-------------------------------|----------------------------------------------|--------------------------------|-----------|-----------------------------|---------------------|----------------------|---------------|----------------------------------|----------------------------------|--------------------------------|--------------------------|------------------------------------------------------------------------------------|---------------------|-----------|---------|---|
| Symbol                                              | Chr#     | Position  | Ref           | Alt           | mutation type                 | HGVSc                                        | HGVSp                          | Patient # | Reads with reference allele | Reads with mutation | Mutation reads ratio | GMAF/Exac MAF | 1000Gp1_AC allele counts in 1000 | ExAC_AC allele counts in ~60,706 | DOMAIN                         | COSMIC_ID                | ClinVar (2019)                                                                     | SIFT                | MetaLR    | MetaSVM |   |
| NF1                                                 | 17       | 29664575  | C             | T             | missense                      | ENST00000358273.4:c.6617C>G                  | ENSP00000351015.4:p.Thr2206Arg | T1        | 79                          | 37                  | 47%                  | -             | -                                | -                                | Superfamily_domains:SSF4837    | -                        | Uncertain                                                                          | deleterious         | T         | T       |   |
|                                                     | 17       | 29664862  | G             | T             | missense                      | ENST00000358273.4:c.6668G>T                  | ENSP00000351015.4:p.Cys223Phe  | T1        | 41                          | 4                   | 9%                   | -             | -                                | -                                | Superfamily_domains:SSF4837    | -                        | deleterious                                                                        | T                   | T         |         |   |
|                                                     | 17       | 29509674  | CATGAATAAGGTA | C             | splicing                      | ENST00000358273.4:c.881_888+4delTGAATAAGGTAA | -                              | T2        | 35                          | 7                   | 16%                  | -             | -                                | -                                | -                              | -                        | -                                                                                  | -                   | -         | -       |   |
|                                                     | 17       | 29677252  | G             | T             | missense                      | ENST00000358273.4:c.7379G>T                  | ENSP00000351015.4:p.Arg2458Ile | T2        | 117                         | 6                   | 5%                   | -             | -                                | -                                | hmmpanther:PTRH10194:SF600     | -                        | -                                                                                  | deleterious         | T         | T       |   |
|                                                     | 17       | 29497003  | C             | T             | stop gained                   | ENST00000358273.4:c.574C>T                   | ENSP00000351015.4:p.Arg192Ter  | T3        | 52                          | 13                  | 25%                  | 0.00008238    | -                                | 1                                | hmmpanther:PTRH10194:SF600     | COSM42794                | Pathogen                                                                           | -                   | -         | -       | - |
|                                                     | 17       | 29556042  | G             | A             | splicing                      | ENST00000358273.4:c.2410-1G>A                | -                              | T4        | 35                          | 6                   | 15%                  | -             | -                                | -                                | -                              | -                        | -                                                                                  | -                   | -         | -       | - |
|                                                     | 17       | 29533315  | C             | T             | stop gained                   | ENST00000358273.4:c.1318C>T                  | ENSP00000351015.4:p.Arg440Ter  | T5a       | 192                         | 85                  | 44%                  | 8.24E-06      | -                                | -                                | hmmpanther:PTRH10194:SF600     | COSM977403               | Pathogen                                                                           | -                   | -         | -       | - |
|                                                     | 17       | 29562641  | C             | T             | stop gained                   | ENST00000358273.4:c.1015G>A                  | ENSP00000351015.4:p.Arg1241Ter | T5c       | 191                         | 32                  | 14%                  | -             | -                                | -                                | Superfamily_domains:SSF4835    | COSM24441                | Pathogen                                                                           | -                   | -         | -       | - |
|                                                     | 17       | 29556143  | G             | A             | stop gained                   | ENST00000358273.4:c.2510G>A                  | ENSP00000351015.4:p.Trp837Ter  | T6        | 41                          | 8                   | 16%                  | -             | -                                | -                                | hmmpanther:PTRH10194:SF600     | -                        | Pathogen                                                                           | -                   | -         | -       | - |
|                                                     | 17       | 29546122  | C             | T             | stop gained                   | ENST00000358273.4:c.1627C>T                  | ENSP00000351015.4:p.Gln543Ter  | T6        | 74                          | 20                  | 21%                  | -             | -                                | -                                | hmmpanther:PTRH10194:SF600     | -                        | Pathogen                                                                           | -                   | -         | -       | - |
| 17                                                  | 29557401 | G         | A             | splicing(LOH) | ENST00000358273.4:c.3113+1G>A | -                                            | T7                             | 0         | 67                          | 100%                | -                    | -             | -                                | -                                | -                              | -                        | -                                                                                  | -                   | -         | -       |   |
| 17                                                  | 29562709 | AG        | A             | frame shift   | ENST00000358273.4:c.3790delG  | ENSP00000351015.4:p.Glu1264LysfTs            | T8                             | 147       | 73                          | 50%                 | -                    | -             | -                                | -                                | Superfamily_domains:SSF4835    | -                        | -                                                                                  | -                   | -         | -       |   |
| DMXL2                                               | 15       | 51756891  | G             | T             | missense                      | ENST00000543779.2:c.7789C>A                  | ENSP00000441858.2:p.Pro2597Thr | T2        | 53                          | 6                   | 10%                  | -             | -                                | -                                | hmmpanther:PTRH13950:SF110     | -                        | -                                                                                  | deleterious         | T         | T       |   |
|                                                     | 15       | 51741351  | T             | A             | stop gained                   | ENST00000543779.2:c.8944A>T                  | ENSP00000441858.2:p.Lys2982Ter | T3        | 61                          | 6                   | 9%                   | -             | -                                | -                                | Superfamily_domains:SSF5097    | -                        | -                                                                                  | -                   | -         | -       |   |
|                                                     | 15       | 51792221  | A             | G             | missense                      | ENST00000543779.2:c.3200T>A                  | ENSP00000441858.2:p.Ile1067Asn | T4        | 110                         | 6                   | 5%                   | -             | -                                | -                                | hmmpanther:PTRH13950:SF110     | -                        | -                                                                                  | deleterious         | T         | T       |   |
|                                                     | 15       | 51829806  | A             | G             | missense                      | ENST00000543779.2:c.1496T>C                  | ENSP00000441858.2:p.Leu499Pro  | T4        | 139                         | 7                   | 5%                   | -             | -                                | -                                | Superfamily_domains:SSF5097    | -                        | -                                                                                  | deleterious         | T         | T       |   |
| FREM2                                               | 13       | 39262630  | C             | A             | missense                      | ENST00000280481.7:c.1149C>A                  | ENSP00000280481.7:p.Phe383Leu  | T1        | 114                         | 8                   | 7%                   | -             | -                                | -                                | hmmpanther:PTRH11878&hmn       | -                        | -                                                                                  | deleterious         | T         | T       |   |
|                                                     | 13       | 39422643  | C             | A             | missense                      | ENST00000280481.7:c.6215C>A                  | ENSP00000280481.7:p.Pro2072His | T1        | 108                         | 6                   | 5%                   | -             | -                                | -                                | hmmpanther:PTRH11878&hmn       | -                        | -                                                                                  | deleterious         | T         | T       |   |
|                                                     | 13       | 39422747  | A             | T             | missense                      | ENST00000280481.7:c.6319A>T                  | ENSP00000280481.7:p.Asn2107Tyr | T3        | 137                         | 8                   | 6%                   | -             | -                                | -                                | hmmpanther:PTRH11878&hmn       | -                        | -                                                                                  | deleterious         | T         | T       |   |
|                                                     | 13       | 39452288  | C             | T             | missense                      | ENST00000280481.7:c.8689C>T                  | ENSP00000280481.7:p.Arg2897Cys | T4        | 114                         | 12                  | 10%                  | -             | -                                | -                                | hmmpanther:PTRH11878&hmn       | -                        | -                                                                                  | deleterious         | D         | D       |   |
| AMOT                                                | X        | 112035168 | C             | A             | missense                      | ENST00000371959.3:c.1818G>T                  | ENSP00000361027.3:p.Met601Ile  | T1        | 64                          | 4                   | 6%                   | -             | -                                | -                                | Coiled-coils_(Ncoils):Coil&hmi | -                        | -                                                                                  | -                   | -         | -       |   |
|                                                     | X        | 112022711 | C             | A             | missense                      | ENST00000371959.3:c.2671G>T                  | ENSP00000361027.3:p.Ala891Ser  | T3        | 190                         | 14                  | 7%                   | -             | -                                | -                                | Low_complexity_(Seg):seg&hnr   | -                        | -                                                                                  | -                   | -         | -       |   |
|                                                     | X        | 112054600 | C             | T             | missense                      | ENST00000371959.3:c.1414G>A                  | ENSP00000361027.3:p.Val472Ile  | T5a       | 167                         | 11                  | 6%                   | -             | -                                | 5                                | Coiled-coils_(Ncoils):Coil&hmi | -                        | -                                                                                  | -                   | -         | -       |   |
| DOCK1                                               | 10       | 129237467 | A             | G             | missense                      | ENST00000280333.6:c.5174A>G                  | ENSP00000280333.6:p.Glu1725Gly | T5a       | 146                         | 8                   | 5%                   | -             | -                                | -                                | -                              | -                        | -                                                                                  | tolerated           | T         | T       |   |
|                                                     | 10       | 12913732  | C             | T             | missense                      | ENST00000280333.6:c.3044C>T                  | ENSP00000280333.6:p.Ala1015Val | T7        | 86                          | 10                  | 10%                  | -             | -                                | -                                | hmmpanther:PTRH23317&hmn       | -                        | -                                                                                  | tolerated           | T         | T       |   |
|                                                     | 10       | 12924274  | C             | T             | missense                      | ENST00000280333.6:c.5285C>T                  | ENSP00000280333.6:p.Pro1762Leu | T8        | 198                         | 17                  | 8%                   | -             | -                                | 1                                | Low_complexity_(Seg):seg       | -                        | -                                                                                  | tolerated           | T         | T       |   |
| DOCK10                                              | 2        | 225710266 | C             | A             | missense                      | ENST00000258390.7:c.2329G>T                  | ENSP00000258390.7:p.Ala775Ser  | T1        | 159                         | 8                   | 5%                   | -             | -                                | -                                | Low_complexity_(Seg):seg&PF    | -                        | -                                                                                  | tolerated           | T         | T       |   |
|                                                     | 2        | 225727425 | G             | T             | stop gained                   | ENST00000258390.7:c.1641C>A                  | ENSP00000258390.7:p.Cys547Ter  | T2        | 64                          | 6                   | 9%                   | -             | -                                | -                                | hmmpanther:PTRH23317:SF710     | -                        | -                                                                                  | -                   | -         | -       |   |
|                                                     | 2        | 225738724 | G             | C             | missense                      | ENST00000258390.7:c.1246C>G                  | ENSP00000258390.7:p.Pro416Ala  | T3        | 156                         | 9                   | 5%                   | -             | -                                | -                                | hmmpanther:PTRH23317:SF710     | -                        | -                                                                                  | tolerated           | T         | T       |   |
| ESRRB                                               | 14       | 76905924  | C             | G             | stop gained                   | ENST00000380887.2:c.228C>G                   | ENSP00000370270.2:p.Tyr76Ter   | T1        | 34                          | 4                   | 11%                  | -             | -                                | -                                | hmmpanther:PTRH24084&hmn       | -                        | -                                                                                  | -                   | -         | -       |   |
|                                                     | 14       | 76957895  | A             | G             | missense                      | ENST00000380887.2:c.893A>G                   | ENSP00000370270.2:p.Lys298Arg  | T4        | 73                          | 6                   | 8%                   | -             | -                                | -                                | hmmpanther:PTRH24084&hmn       | -                        | -                                                                                  | tolerated           | D         | D       |   |
|                                                     | 14       | 76964736  | G             | A             | missense                      | ENST00000380887.2:c.1237G>A                  | ENSP00000370270.2:p.Val131Ile  | T8        | 27                          | 6                   | 18%                  | -             | -                                | 12                               | 1336                           | hmmpanther:PTRH24084&hmn | -                                                                                  | Benign/Li           | tolerated | T       | T |
| GPC4                                                | X        | 132427211 | C             | A             | missense                      | ENST00000370828.3:c.216G>T                   | ENSP00000359864.3:p.Glu72Asp   | T1        | 82                          | 6                   | 7%                   | -             | -                                | -                                | hmmpanther:PTRH10822:SF250     | -                        | -                                                                                  | deleterious         | T         | T       |   |
|                                                     | X        | 132440114 | A             | G             | missense                      | ENST00000370828.3:c.1451T>C                  | ENSP00000359864.3:p.Val484Ala  | T3        | 116                         | 6                   | 5%                   | -             | -                                | -                                | hmmpanther:PTRH10822:SF250     | -                        | -                                                                                  | deleterious         | T         | T       |   |
|                                                     | X        | 132473314 | C             | A             | missense                      | ENST00000370828.3:c.946G>T                   | ENSP00000359864.3:p.Asp316Tyr  | T8        | 75                          | 39                  | 34%                  | -             | -                                | -                                | hmmpanther:PTRH10822:SF250     | -                        | -                                                                                  | deleterious         | T         | T       |   |
| HMCN1                                               | 1        | 185953439 | G             | T             | missense                      | ENST00000271588.4:c.2929G>T                  | ENSP00000271588.4:p.Val977Leu  | T1        | 151                         | 11                  | 7%                   | -             | -                                | -                                | hmmpanther:PTRH19897:SF150     | -                        | -                                                                                  | deleterious         | D         | D       |   |
|                                                     | 1        | 185946996 | C             | T             | stop gained                   | ENST00000271588.4:c.2449C>T                  | ENSP00000271588.4:p.Gln817Ter  | T4        | 137                         | 13                  | 9%                   | -             | -                                | -                                | PROSITE_profiles:P550835&hmi   | -                        | -                                                                                  | -                   | -         | -       |   |
|                                                     | 1        | 185891512 | C             | T             | missense                      | ENST00000271588.4:c.902C>T                   | ENSP00000271588.4:p.Thr301Ile  | T5a       | 65                          | 6                   | 8%                   | -             | -                                | -                                | hmmpanther:PTRH19897:SF150     | -                        | -                                                                                  | tolerated           | T         | T       |   |
| MDN1                                                | 6        | 90497672  | G             | T             | missense                      | ENST00000369393.3:c.1235C>A                  | ENSP00000358400.3:p.Ser412Tyr  | T2        | 71                          | 5                   | 7%                   | -             | -                                | -                                | hmmpanther:PTRH22908:SF580     | -                        | -                                                                                  | deleterious         | T         | T       |   |
|                                                     | 6        | 90472182  | G             | C             | missense                      | ENST00000369393.3:c.2212C>G                  | ENSP00000358400.3:p.Gln738Glu  | T3        | 93                          | 5                   | 5%                   | -             | -                                | -                                | hmmpanther:PTRH22908:SF580     | -                        | -                                                                                  | tolerated           | T         | T       |   |
|                                                     | 6        | 90402239  | G             | A             | missense                      | ENST00000369393.3:c.10510C>T                 | ENSP00000358400.3:p.Leu3504Phe | T7        | 39                          | 4                   | 9%                   | -             | -                                | -                                | hmmpanther:PTRH22908:SF580     | -                        | -                                                                                  | deleterious         | T         | T       |   |
| PKHD11                                              | 8        | 110432873 | A             | T             | missense                      | ENST00000378402.5:c.2651A>T                  | ENSP00000367655.5:p.Tyr884Phe  | T1        | 127                         | 8                   | 6%                   | -             | -                                | -                                | hmmpanther:PTRH11915&hmn       | -                        | -                                                                                  | tolerated           | T         | T       |   |
|                                                     | 8        | 110535503 | G             | T             | missense                      | ENST00000378402.5:c.12372G>T                 | ENSP00000367655.5:p.Arg4124Ser | T2        | 57                          | 3                   | 5%                   | -             | -                                | -                                | -                              | -                        | -                                                                                  | tolerated           | T         | T       |   |
|                                                     | 8        | 110445445 | G             | T             | stop gained                   | ENST00000378402.5:c.3340G>T                  | ENSP00000367655.5:p.Glu1114Ter | T3        | 81                          | 6                   | 7%                   | -             | -                                | -                                | hmmpanther:PTRH11915&hmn       | -                        | -                                                                                  | -                   | -         | -       |   |
| PPP2R3A                                             | 3        | 135722018 | G             | T             | missense                      | ENST00000264977.3:c.1678G>T                  | ENSP00000264977.3:p.Val560Phe  | T1        | 28                          | 4                   | 13%                  | -             | -                                | -                                | hmmpanther:PTRH14095&hmn       | -                        | -                                                                                  | tolerated_low_confu | T         | T       |   |
|                                                     | 3        | 135821011 | G             | T             | missense                      | ENST00000264977.3:c.3090G>T                  | ENSP00000264977.3:p.Lys1030Asn | T3        | 252                         | 12                  | 5%                   | -             | -                                | -                                | hmmpanther:PTRH14095&hmn       | -                        | -                                                                                  | deleterious         | T         | T       |   |
|                                                     | 3        | 135721626 | A             | G             | missense                      | ENST00000264977.3:c.1286A>G                  | ENSP00000264977.3:p.Lys429Arg  | T4        | 36                          | 5                   | 12%                  | -             | -                                | -                                | hmmpanther:PTRH14095&hmn       | -                        | -                                                                                  | tolerated_low_confu | T         | T       |   |
| PTPRS                                               | 19       | 5212020   | C             | A             | missense                      | ENST00000357368.4:c.5011G>T                  | ENSP00000349932.4:p.Val1671Leu | T1        | 65                          | 6                   | 8%                   | -             | -                                | -                                | Superfamily_domains:SSF5279    | -                        | -                                                                                  | tolerated           | T         | T       |   |
|                                                     | 19       | 5220096   | G             | T             | missense                      | ENST00000357368.4:c.3619C>A                  | ENSP00000349932.4:p.Pro1207Thr | T3        | 55                          | 6                   | 10%                  | -             | -                                | -                                | hmmpanther:PTRH19134:SF200     | -                        | -                                                                                  | deleterious         | T         | T       |   |
|                                                     | 19       | 5286108   | G             | A             | missense                      | ENST00000357368.4:c.44C>T                    | ENSP00000349932.4:p.Pro15Leu   | T8        | 31                          | 8                   | 21%                  | -             | -                                | -                                | Low_complexity_(Seg):seg&Tr    | -                        | -                                                                                  | tolerated_low_confu | T         | T       |   |
| SLC4A7                                              | 3        | 27436157  | A             | T             | missense                      | ENST00000295736.5:c.2942T>A                  | ENSP00000295736.5:p.Ile981Lys  | T3        | 131                         | 7                   | 5%                   | -             | -                                | -                                | hmmpanther:PTRH11453&hmn       | -                        | -                                                                                  | deleterious         | D         | D       |   |
|                                                     | 3        | 27462214  | T             | C             | missense                      | ENST00000295736.5:c.1462A>G                  | ENSP00000295736.5:p.Ile488Val  | T4        | 139                         | 8                   | 6%                   | C:4.118e-05   | -                                | 5                                | hmmpanther:PTRH11453&hmn       | -                        | -                                                                                  | tolerated           | D         | D       |   |
|                                                     | 3        | 27444771  | T             | C             | missense                      | ENST00000295736.5:c.2153A>G                  | ENSP00000295736.5:p.Tyr718Cys  | T5c       | 41                          | 3                   | 7%                   | -             | -                                | -                                | Transmembrane_helices:TMHe     | -                        | -                                                                                  | deleterious         | D         | D       |   |
| AGAP2                                               | 12       | 58126185  | C             | T             | splicing                      | ENST00000547588.1:c.1794+1G>A                | ENST00000547588.1:c.1794+1G>A  | T3        | 94                          | 8                   | 8%                   | -             | -                                | -                                | -                              | -                        | -                                                                                  | -                   | -         | -       |   |
|                                                     | 12       | 58125655  | C             | T             | missense                      | ENST00000547588.1:c.1910G>A                  | ENSP00000449241.1:p.Gly637Glu  | T7        | 64                          | 5                   | 7%                   | -             | -                                | -                                | hmmpanther:PTRH23180&hmn       | -                        | -                                                                                  | tolerated           | T         | T       |   |
| DENND2C                                             | 1        | 115166127 | C             | A             | splicing                      | ENST00000393274.1:c.943+1G>T                 | ENST00000393274.1:c.943+1G>T   | T1        | 93                          | 8                   | 8%                   | -             | -                                | -                                | -                              | -                        | -                                                                                  | -                   | -         | -       |   |
|                                                     | 1        | 115130518 | C             | A             | missense                      | ENST00000357232.4:c.2234G>T                  | ENSP00000349768.3:p.Gly745Val  | T3        | 113                         | 8                   | 7%                   | -             | -                                | -                                | PROSITE_profiles:P550268&hmi   |                          |                                                                                    |                     |           |         |   |



**Supplementary Table 5: Overlapped gemline variant genes in DNF data**

Variants with deleterious, damaging, and/or pathogenic effect (see Suppl. Table 9)

| Symbol     | chr   | LOC       | Ref | Alt | Consequences            | Impact            | GMAF               | ExAC_AC | Patient                 | HGVSc                        | HGVSp                           | ClinVar (2019)         | SIFT        | MetaLR | MetaSVM |
|------------|-------|-----------|-----|-----|-------------------------|-------------------|--------------------|---------|-------------------------|------------------------------|---------------------------------|------------------------|-------------|--------|---------|
| AC079612.1 | chr2  | 240498659 | C   | T   | upstream_gene_variant   | MODIFIER T:0.0008 |                    |         | patient8_tumor_syn4985  | -                            | -                               |                        | -           | -      | -       |
| AC079612.1 | chr2  | 240505863 | G   | A   | 3_prime_UTR_variant     | MODIFIER A:0.0008 |                    |         | patient6_tumor_syn4985  | ENST00000358775.1:c.*1059G>A | -                               | -                      | -           | -      | -       |
| ANKK1      | chr11 | 113270124 | G   | A   | missense_variant        | MODERA A:0.0072   | A:3.253e-03        |         | patient2_tumor_syn4985  | ENST00000303941.3:c.1433G>A  | ENSP00000306678.3:p.Arg478Gln   |                        | tolerated   | T      | T       |
| ANKK1      | chr11 | 113270178 | C   | A   | missense_variant        | MODERA A:0.0072   | A:3.272e-03        |         | patient2_tumor_syn4985  | ENST00000303941.3:c.1487C>A  | ENSP00000306678.3:p.Trp496Asn   |                        | deleterious | D      | D       |
| ANKRD30A   | chr10 | 37455581  | G   | A   | missense_variant        | MODERATE          | A:7.236e-05        |         | patient6_tumor_syn4985  | ENST00000361713.1:c.1945G>A  | ENSP00000354432.1:p.Ala649Thr   |                        | tolerated   | T      | T       |
| ANKRD30A   | chr10 | 37481992  | A   | G   | missense_variant&splice | MODERA G:0.0042   | G:1.838e-03        |         | patient2_tumor_syn4985  | ENST00000361713.1:c.2345A>G  | ENSP00000354432.1:p.Glu782Gly   |                        | deleterious | T      | T       |
| ATM        | chr11 | 108153488 | A   | G   | missense_variant        | MODERATE          | G:3.295e-05        |         | patient11_tumor_syn4985 | ENST00000278616.4:c.3628A>G  | ENSP00000278616.4:p.Met1210Val  | Uncertain_significance | tolerated   | T      | T       |
| ATM        | chr11 | 108188136 | G   | A   | missense_variant        | MODERA A:0.0028   | A:2.570e-03        |         | patient8_tumor_syn4985  | ENST00000278616.4:c.6235G>A  | ENSP00000278616.4:p.Val2079Ile  | Benign/Likely_benign   | tolerated   | T      | T       |
| ATM        | chr11 | 108198391 | T   | C   | missense_variant        | MODERA C:0.0072   |                    |         | patient8_tumor_syn4985  | ENST00000278616.4:c.6995T>C  | ENSP00000278616.4:p.Leu2332Pro  | Benign/Likely_benign   | tolerated   | T      | T       |
| ATM        | chr11 | 108236279 | A   | G   | 3_prime_UTR_variant     | MODIFIER G:0.0028 | G:2.398e-03        |         | patient8_tumor_syn4985  | ENST00000278616.4:c.*44A>G   | -                               | Uncertain_significance | -           | -      | -       |
| ATM        | chr11 | 108236471 | C   | T   | 3_prime_UTR_variant     | MODIFIER T:0.0028 |                    |         | patient8_tumor_syn4985  | ENST00000278616.4:c.*236C>T  | -                               | Uncertain_significance | -           | -      | -       |
| CELSR2     | chr1  | 109794593 | C   | T   | missense_variant        | MODERA T:0.0012   | T:3.904e-03        |         | patient1_tumor_syn4985  | ENST00000271332.3:c.1892C>T  | ENSP00000271332.3:p.Trp631Met   |                        | deleterious | T      | T       |
| CELSR2     | chr1  | 109807571 | C   | T   | missense_variant        | MODERA T:0.0056   | T:1.540e-03        |         | patient11_tumor_syn4985 | ENST00000271332.3:c.5546C>T  | ENSP00000271332.3:p.Ala1849Val  |                        | tolerated   | D      | T       |
| CELSR2     | chr1  | 109816898 | C   | G   | 3_prime_UTR_variant     | MODIFIER G:0.0058 |                    |         | patient3_tumor_syn4987  | ENST00000271332.3:c.*227C>G  | -                               | -                      | -           | -      | -       |
| CELSR2     | chr1  | 109817633 | A   | G   | 3_prime_UTR_variant     | MODIFIER G:0.0054 |                    |         | patient3_tumor_syn4987  | ENST00000271332.3:c.*962A>G  | -                               | -                      | -           | -      | -       |
| COL4A1     | chr8  | 121267490 | G   | A   | missense_variant        | MODERA A:0.0028   | A:5.247e-03        |         | patient3_tumor_syn4987  | ENST00000297848.3:c.2764G>A  | ENSP00000297848.3:p.Val922Ile   |                        | tolerated   | T      | T       |
| COL4A2     | chr13 | 111114519 | C   | A   | missense_variant        | MODERA A:0.0054   | A:1.506e-03        |         | patient8_tumor_syn4985  | ENST00000360467.5:c.1655C>A  | ENSP00000353654.5:p.Thr552Lys   | Likely_benign          | tolerated   | T      | T       |
| COL4A2     | chr13 | 111164467 | G   | A   | missense_variant        | MODERA A:0.0010   | A:5.370e-04&T:8.26 |         | patient8_tumor_syn4985  | ENST00000360467.5:c.5068G>A  | ENSP00000353654.5:p.Ala1690Thr  | Likely_benign          | tolerated   | D      | T       |
| COL4A2     | chr13 | 111164563 | T   | C   | 3_prime_UTR_variant     | MODIFIER C:0.0088 | C:2.905e-03        |         | patient8_tumor_syn4985  | ENST00000360467.5:c.*25T>C   | -                               | -                      | -           | -      | -       |
| CUBN       | chr10 | 16893406  | G   | C   | missense_variant        | MODERA C:0.0078   | A:3.295e-05&C:1.99 |         | patient8_tumor_syn4985  | ENST00000378333.4:c.9491C>G  | ENSP00000367064.4:p.Ser3164Trp  | Uncertain_significance | deleterious | T      | T       |
| CUBN       | chr10 | 16960624  | T   | C   | missense_variant        | MODERA C:0.0028   | C:1.063e-03        |         | patient11_tumor_syn4985 | ENST00000378333.4:c.6997A>G  | ENSP00000367064.4:p.Ile2333Val  | Uncertain_significance | tolerated   | T      | T       |
| CUBN       | chr10 | 17153023  | C   | T   | missense_variant        | MODERA T:0.0092   | T:4.110e-03        |         | patient2_tumor_syn4987  | ENST00000378333.4:c.910G>A   | ENSP00000367064.4:p.Glu304Lys   | Uncertain_significance | deleterious | D      | T       |
| EML6       | chr2  | 55197958  | T   | C   | 3_prime_UTR_variant     | MODIFIER T:0.0036 |                    |         | patient3_tumor_syn4987  | ENST00000356458.6:c.*727T>C  | -                               | -                      | -           | -      | -       |
| EML6       | chr2  | 55198728  | A   | G   | 3_prime_UTR_variant     | MODIFIER G:0.0030 |                    |         | patient9_tumor_syn4985  | ENST00000356458.6:c.*1497A>G | -                               | -                      | -           | -      | -       |
| FCGBP      | chr19 | 40367555  | C   | T   | missense_variant        | MODERA T:0.0098   | T:3.417e-03        |         | patient3_tumor_syn4987  | ENST00000221347.6:c.13405G>A | ENSP00000221347.5:p.Val4469Ile  |                        | tolerated   | T      | T       |
| FCGBP      | chr19 | 40430459  | G   | A   | missense_variant        | MODERA A:0.0002   | A:2.638e-04        |         | patient9_tumor_syn4985  | ENST00000221347.6:c.1484C>T  | ENSP00000221347.5:p.Ser495Leu   |                        | tolerated   | T      | T       |
| KIFC1      | chr6  | 33359736  | C   | G   | 5_prime_UTR_variant     | MODIFIER G:0.0056 | G:8.602e-03        |         | patient4_tumor_syn4985  | ENST00000428849.2:c.*-27C>G  | -                               | -                      | -           | -      | -       |
| KIFC1      | chr6  | 33371806  | G   | A   | missense_variant        | MODERA A:0.0090   | A:8.945e-03        |         | patient6_tumor_syn4985  | ENST00000428849.2:c.656G>A   | ENSP00000393963.2:p.Arg219Gln   |                        | tolerated   | T      | T       |
| KIFC1      | chr6  | 33371806  | G   | A   | missense_variant        | MODERA A:0.0090   | A:8.945e-03        |         | patient4_tumor_syn4985  | ENST00000428849.2:c.656G>A   | ENSP00000393963.2:p.Arg219Gln   |                        | tolerated   | T      | T       |
| KIFC1      | chr6  | 33372689  | C   | T   | missense_variant        | MODERA T:0.0016   | T:2.883e-03        |         | patient4_tumor_syn4985  | ENST00000428849.2:c.817C>T   | ENSP00000393963.2:p.Arg273Trp   |                        | deleterious | T      | T       |
| MUC16      | chr19 | 9014194   | A   | T   | missense_variant        | MODERATE          | T:3.307e-05        |         | patient11_tumor_syn4985 | ENST00000397910.4:c.38454T>A | ENSP00000381008.2:p.His12818Gln |                        | -           | T      | T       |
| MUC16      | chr19 | 9010991   | C   | T   | missense_variant        | MODERATE          | T:1.655e-05&G:8.27 |         | patient6_tumor_syn4985  | ENST00000397910.4:c.38927G>A | ENSP00000381008.2:p.Ser12976Asn |                        | -           | T      | T       |
| MUC16      | chr19 | 9010991   | C   | T   | missense_variant        | MODERATE          | T:1.655e-05&G:8.27 |         | patient2_tumor_syn4985  | ENST00000397910.4:c.38927G>A | ENSP00000381008.2:p.Ser12976Asn |                        | -           | T      | T       |
| MUC16      | chr19 | 9009614   | T   | C   | missense_variant        | MODERATE          | C:4.961e-05&G:8.26 |         | patient4_tumor_syn4985  | ENST00000397910.4:c.39112A>G | ENSP00000381008.2:p.Thr13038Ala |                        | -           | T      | T       |
| MUC16      | chr19 | 8993008   | G   | C   | missense_variant&splice | MODERA C:0.0092   | C:2.970e-03        |         | patient8_tumor_syn4985  | ENST00000397910.4:c.41751C>G | ENSP00000381008.2:p.Ser13917Arg |                        | -           | T      | T       |
| NF1        | chr17 | 29486054  | A   | T   | missense_variant        | MODERA A:0.0002   | T:3.295e-05&G:8.23 |         | patient8_tumor_syn4985  | ENST00000358273.4:c.231A>T   | ENSP00000351015.4:p.Lys77Asn    | Uncertain_significance | deleterious | T      | T       |
| NF1        | chr17 | 29497003  | C   | T   | stop_gained             | HIGH              | T:8.238e-06        |         | patient8_tumor_syn4985  | ENST00000358273.4:c.574C>T   | ENSP00000351015.4:p.Arg192Ter   | Pathogenic             | -           | -      | -       |
| NF1        | chr17 | 29541542  | A   | G   | missense_variant        | MODERATE          | G:1.647e-05        |         | patient5_tumor_syn4985  | ENST00000358273.4:c.1466A>G  | ENSP00000351015.4:p.Tyr489Cys   | Pathogenic             | tolerated   | T      | T       |
| NF1        | chr17 | 29588751  | C   | T   | stop_gained             | HIGH              | T:8.236e-06        |         | patient9_tumor_syn4985  | ENST00000358273.4:c.4600C>T  | ENSP00000351015.4:p.Arg1534Ter  | Pathogenic/Likely_path | -           | -      | -       |
| NF1        | chr17 | 29702631  | A   | G   | 3_prime_UTR_variant     | MODIFIER G:0.0094 |                    |         | patient11_tumor_syn4985 | ENST00000358273.4:c.*1458A>G | -                               | -                      | -           | -      | -       |
| OBSCN      | chr1  | 228404401 | A   | G   | missense_variant&splice | MODERA G:0.0002   | G:9.381e-05        |         | patient11_tumor_syn4985 | ENST00000570156.2:c.2375A>G  | ENSP00000455507.2:p.Gln792Arg   |                        | tolerated   | T      | T       |
| OBSCN      | chr1  | 228468437 | G   | A   | missense_variant        | MODERA A:0.0034   | A:1.034e-03        |         | patient11_tumor_syn4985 | ENST00000570156.2:c.9424G>A  | ENSP00000455507.2:p.Ala3142Thr  |                        | tolerated   | T      | T       |
| OBSCN      | chr1  | 228470764 | C   | T   | missense_variant        | MODERA T:0.0092   | T:2.089e-03        |         | patient11_tumor_syn4985 | ENST00000570156.2:c.9803C>T  | ENSP00000455507.2:p.Ala3268Val  |                        | tolerated   | T      | T       |
| OBSCN      | chr1  | 228481916 | C   | T   | missense_variant        | MODERATE          | A:8.256e-06&T:2.47 |         | patient10_tumor_syn4985 | ENST00000570156.2:c.12482C>T | ENSP00000455507.2:p.Thr4161Met  |                        | tolerated   | T      | T       |
| OBSCN      | chr1  | 228509861 | C   | T   | missense_variant        | MODERA T:0.0002   | T:1.652e-04        |         | patient11_tumor_syn4985 | ENST00000570156.2:c.18190C>T | ENSP00000455507.2:p.Pro6064Ser  |                        | tolerated   | T      | T       |
| OBSCN      | chr1  | 228511241 | G   | A   | missense_variant        | MODERATE          | A:4.948e-05        |         | patient3_tumor_syn4987  | ENST00000570156.2:c.18457G>A | ENSP00000455507.2:p.Val6153Ile  |                        | deleterious | T      | T       |
| OBSCN      | chr1  | 228557680 | C   | A   | missense_variant        | MODERA A:0.0010   | A:1.901e-04        |         | patient2_tumor_syn4987  | ENST00000570156.2:c.22876C>A | ENSP00000455507.2:p.Arg726Ser   |                        | deleterious | T      | T       |
| OBSCN      | chr1  | 228560317 | G   | A   | missense_variant        | MODERATE          | A:8.567e-04        |         | patient4_tumor_syn4985  | ENST00000570156.2:c.24709G>A | ENSP00000455507.2:p.Val8237Met  |                        | deleterious | T      | T       |
| PASK       | chr2  | 242063458 | C   | T   | missense_variant        | MODERA T:0.0032   | T:8.236e-06&T:9.44 |         | patient4_tumor_syn4985  | ENST00000358649.4:c.2810G>A  | ENSP00000351475.4:p.Arg937His   |                        | deleterious | T      | T       |
| PKHD11     | chr8  | 110418593 | A   | G   | missense_variant        | MODERA G:0.0020   | G:3.450e-04        |         | patient2_tumor_syn4987  | ENST00000378402.5:c.1699A>G  | ENSP00000367655.5:p.Ile567Val   |                        | tolerated   | T      | T       |
| PKHD11     | chr8  | 110432873 | A   | G   | missense_variant        | MODERA G:0.0014   | G:2.185e-03        |         | patient1_tumor_syn4985  | ENST00000378402.5:c.2651A>G  | ENSP00000367655.5:p.Tyr884Cys   |                        | tolerated   | T      | T       |
| PKHD11     | chr8  | 110450593 | G   | T   | missense_variant        | MODERA T:0.0054   | T:8.477e-03        |         | patient4_tumor_syn4985  | ENST00000378402.5:c.3668G>T  | ENSP00000367655.5:p.Gly1223Val  |                        | deleterious | T      | T       |
| PKHD11     | chr8  | 110450593 | G   | T   | missense_variant        | MODERA T:0.0054   | T:8.477e-03        |         | patient3_tumor_syn4987  | ENST00000378402.5:c.3668G>T  | ENSP00000367655.5:p.Gly1223Val  |                        | deleterious | T      | T       |
| PKHD11     | chr8  | 110477066 | C   | T   | stop_gained             | HIGH              | T:1.333e-03        |         | patient9_tumor_syn4985  | ENST00000378402.5:c.8005C>T  | ENSP00000367655.5:p.Gln2669Ter  |                        | -           | -      | -       |
| RGPD4      | chr2  | 108443503 | G   | C   | missense_variant        | MODERA C:0.0078   | A:8.326e-06&C:7.80 |         | patient4_tumor_syn4985  | ENST00000408999.3:c.34G>C    | ENSP00000386810.3:p.Val122Leu   |                        | deleterious | T      | T       |
| SLC14A2    | chr18 | 43195469  | G   | A   | 5_prime_UTR_variant     | MODIFIER A:0.0028 |                    |         | patient9_tumor_syn4985  | ENST00000255226.6:c.-113G>A  | -                               | -                      | -           | -      | -       |
| SLC14A2    | chr18 | 43262408  | G   | A   | missense_variant        | MODERA A:0.0052   | A:8.195e-03&T:8.23 |         | patient8_tumor_syn4985  | ENST00000255226.6:c.2687G>A  | ENSP00000255226.5:p.Arg896His   |                        | deleterious | T      | T       |

End note: Highlighted sites are recurrent mutations showed in different PNF and DNF samples

End note: Highlighted sites are recurrent mutation with same site on same gene in different PNF (Ratner), DNF (Gosline) and PNF (Pemov) samples.

Yellow: Overlapped mutated sites between PNF (Ratner) and DNF (Gosline)

Orange: Overlapped mutated sites between three datasets.

**Supplementary Table 6: Overlapped somatic variant genes in DNF data**

|        |       |          |     |     |                |          |          |           |                                  |       |        | Variants with deleterious, damaging, and/or pathogenic effect |      |        |         |
|--------|-------|----------|-----|-----|----------------|----------|----------|-----------|----------------------------------|-------|--------|---------------------------------------------------------------|------|--------|---------|
| Symbol | chr   | LOC      | Ref | Alt | Consequences   | Impact   | GMAF     | Patient   | HGVSc                            | HGVSp | COSMIC | ClinVar                                                       | SIFT | MetaLR | MetaSVM |
| DMXL2  | chr15 | 51798638 | G   | T   | intron_variant | MODIFIER | T:0.0092 | patient6  | ENST00000543779.2:c.2764+693C>A  |       | -      | -                                                             | -    | -      | -       |
| MACF1  | chr1  | 39597015 | T   | A   | intron_variant | MODIFIER | A:0.0034 | patient10 | ENST00000545844.1:c.220+46905T>A |       | -      | -                                                             | -    | -      | -       |
| MACF1  | chr1  | 39597015 | T   | A   | intron_variant | MODIFIER | A:0.0034 | patient9  | ENST00000545844.1:c.220+46905T>A |       | -      | -                                                             | -    | -      | -       |
| MACF1  | chr1  | 39597015 | T   | A   | intron_variant | MODIFIER | A:0.0034 | patient9  | ENST00000545844.1:c.220+46905T>A |       | -      | -                                                             | -    | -      | -       |
| MYH9   | chr22 | 36673329 | C   | T   | downstream_g   | MODIFIER | T:0.0054 | patient8  | -                                |       | -      | -                                                             | -    | -      | -       |



**Supplemental Table7: Overlapped germline variant genes in PNF (Pemov et al, Re-analyzed with VarScan2)**

| SYMBOL   | Patient | CHROM     | POS       | REF | ALT                   | Consequence             | IMPACT                        | HGVSc                          | HGVSp                            | GMAF        | ExAC_MAF                | Existing_variation     | CinVar (2019) | SIFT                    | MetaLR | MetaSV M          |   |
|----------|---------|-----------|-----------|-----|-----------------------|-------------------------|-------------------------------|--------------------------------|----------------------------------|-------------|-------------------------|------------------------|---------------|-------------------------|--------|-------------------|---|
| ANKK1    | p9      | chr11     | 11326080  | G   | T                     | splice_acceptor_variant | HIGH                          | ENST00000303941.3:c.633-1G>T   |                                  | T:0.006     | T:2.440e-03             | r139841238             |               |                         |        |                   |   |
| ANKRD30A | p23     | chr10     | 3741292   | G   | T                     | stop_gained             | HIGH                          | ENST00000361713.1:c.328G>T     | ENSP0000034432.1:p.Glu110Ter     | T:0.060     | A:1.654e-05&T:0.012     | r116939015             |               |                         |        |                   |   |
|          | p24     | chr10     | 3741292   | G   | T                     | stop_gained             | HIGH                          | ENST00000361713.1:c.328G>T     | ENSP0000034432.1:p.Glu110Ter     | T:0.060     | A:1.654e-05&T:0.012     | r116939015             |               |                         |        |                   |   |
|          | chr10   | 3743929   | G         | T   | missense_variant      | MODERATE                | ENST00000361713.1:c.1232G>T   | ENSP0000034432.1:p.Arg111Met   |                                  | T:8.032e-04 |                         | r202149101             |               | T&T                     | T      | T                 |   |
|          | p5      | chr10     | 3750586   | G   | T                     | missense_variant        | MODERATE                      | ENST00000361713.1:c.1238G>C    | ENSP0000034432.1:p.Val115Leu     | T:0.004     | T:4.114e-03             | r5551835&COSM132707    |               |                         |        |                   |   |
| ATM      | p27     | chr11     | 10829676  | C   | G                     | missense_variant        | MODERATE                      | ENST00000278616.4:c.198C>G     | ENSP00000278616.4:p.Ser69Cys     | G:0.0041    | G:7.369e-03             | r5880504               |               | Benign/Likely_benig     |        | D&D&D&D           |   |
|          | p5      | chr11     | 10812621  | T   | G                     | missense_variant        | MODERATE                      | ENST00000278616.4:c.1880T>G    | ENSP00000278616.4:p.Phe627Cys    | G:0.0002    | G:1.648e-05             | r554608785             |               | Uncertain_significance  | T&T    | T                 |   |
|          | p8      | chr11     | 10812035  | G   | A                     | missense_variant        | MODERATE                      | ENST00000278616.4:c.2218G>A    | ENSP00000278616.4:p.Ala740Thr    |             |                         |                        |               | Uncertain_significance  | D&D&D  | D                 |   |
|          | p16     | chr11     | 10819894  | C   | A                     | missense_variant        | MODERATE                      | ENST00000278616.4:c.699C>A     | ENSP00000278616.4:p.Thr233Lys    |             | A:6.589e-05&T:4.118e-03 | r150509164             |               | Conflicting_interpreta  | D&D    | T                 |   |
|          | chr11   | 10820123  | C         | T   | missense_variant      | MODERATE                | ENST00000278616.4:c.7390T>C   | ENSP00000278616.4:p.Cys264Arg  |                                  | C:5.683e-04 |                         | r55801750&COSM758329   |               | Conflicting_interpreta  | T&T    | T                 |   |
| CELSR2   | p22     | chr1      | 15993126  | G   | A                     | missense_variant        | MODERATE                      | ENST00000271332.3:c.425A>G     | ENSP00000271332.3:p.Arg1420Gln   |             |                         |                        |               |                         |        | T                 |   |
|          | p10     | chr1      | 109803697 | G   | A                     | missense_variant        | MODERATE                      | ENST00000271332.3:c.3992G>A    | ENSP00000271332.3:p.Arg1331His   | A:0.0012    | A:1.145e-03             | r115077620             |               |                         |        | T                 |   |
|          | p8      | chr1      | 109810200 | G   | A                     | missense_variant        | MODERATE                      | ENST00000271332.3:c.6044G>A    | ENSP00000271332.3:p.Arg2015Ile   | A:0.0096    | A:0.022                 | r57203203              |               |                         |        | D                 |   |
|          | p7      | chr1      | 109811223 | G   | T                     | splice_donor_variant    | HIGH                          | ENST00000271332.3:c.7483-1G>T  |                                  |             |                         |                        |               |                         |        | T                 |   |
| COL14A1  | p25     | chr8      | 121256206 | C   | T                     | missense_variant        | MODERATE                      | ENST00000297848.1:c.243C>G     | ENSP00000297848.1:p.Thr313Met    |             | T:4.655e-04             | r1348211340            |               |                         |        | T&T&T&T           |   |
| COL4A2   | chr8    | 111118344 | C         | T   | splice_region_variant | LOW                     | ENST00000360467.5:c.1979-4C>T |                                |                                  | T:0.0026    | T:4.532e-03             | r190632602             |               |                         |        | Likely_benign     |   |
| CUBN     | p25     | chr10     | 1687012   | G   | T                     | missense_variant        | MODERATE                      | ENST00000377833.4:c.1065G>A    | ENSP0000037064.4:p.Asn355Lys     |             |                         |                        |               |                         |        | Likely_benign     |   |
|          | p17     | chr10     | 16882363  | G   | A                     | missense_variant        | MODERATE                      | ENST00000377833.4:c.999G>C     | ENSP0000037064.4:p.Thr333Met     |             | A:3.295e-05&T:1.647e-03 | r1140637500            |               |                         |        | T&T               |   |
|          | p9      | chr10     | 1689486   | G   | C                     | missense_variant        | MODERATE                      | ENST00000377833.4:c.981C>G     | ENSP0000037064.4:p.Ser344Pro     | C:0.0078    | A:2.255e-05&C:1.993e-05 | r57192244              |               | Uncertain_significance  | D      | T                 |   |
|          | p27     | chr10     | 1692184   | G   | A                     | missense_variant        | MODERATE                      | ENST00000377833.4:c.871G>T     | ENSP0000037064.4:p.Ala291Val     | A:0.006     | A:0.012                 | r5551835&COSM132707    |               | Uncertain_significance  | D      | T                 |   |
|          | p12     | chr10     | 16942831  | C   | A                     | missense_variant        | MODERATE                      | ENST00000377833.4:c.820G>T     | ENSP0000037064.4:p.Asp273Tyr     |             | A:2.234e-04             | r134802222             |               | Uncertain_significance  | D      | T                 |   |
|          | p11     | chr10     | 16955978  | A   | T                     | missense_variant        | MODERATE                      | ENST00000377833.4:c.785T>A     | ENSP0000037064.4:p.Asp245Glu     | T:0.0026    | T:5.650e-03             | r111712856             |               | Uncertain_significance  | T      | T                 |   |
|          | p8      | chr10     | 16967417  | T   | C                     | missense_variant        | MODERATE                      | ENST00000377833.4:c.646A>G     | ENSP0000037064.4:p.Asn2157Asp    | C:0.0032    | C:5.610e-03             | r134460241             |               | Uncertain_significance  | T      | T                 |   |
|          | p10     | chr10     | 16981015  | T   | C                     | missense_variant        | MODERATE                      | ENST00000377833.4:c.658G>A     | ENSP0000037064.4:p.Ile189Val     | C:0.0050    | C:1.293e-03             | r57678990              |               | Uncertain_significance  | T      | T                 |   |
|          | p16     | chr10     | 17089963  | C   | T                     | missense_variant        | MODERATE                      | ENST00000377833.4:c.373C>G     | ENSP0000037064.4:p.Ser1251Thr    | G:0.0064    | G:1.756e-03             | r115926680             |               | Uncertain_significance  | T      | T                 |   |
| FCGBP    | p23     | chr19     | 40354279  | G   | A                     | missense_variant        | MODERATE                      | ENST00000221347.6:c.1619C>T    | ENSP00000221347.6:p.Ala397Val    |             | A:1.483e-04             | r139845989             |               |                         |        | T                 |   |
|          | p24     | chr19     | 40354279  | G   | A                     | missense_variant        | MODERATE                      | ENST00000221347.6:c.1619C>T    | ENSP00000221347.6:p.Ala397Val    |             | A:1.483e-04             | r139845989             |               |                         |        | T                 |   |
|          | p13     | chr19     | 40357636  | C   | T                     | missense_variant        | MODERATE                      | ENST00000221347.6:c.1567G>A    | ENSP00000221347.6:p.Arg5226Gln   | T:0.0002    | T:8.236e-05             | r202029040             |               |                         |        | T                 |   |
|          | p16     | chr19     | 40376811  | C   | T                     | missense_variant        | MODERATE                      | ENST00000221347.6:c.11611G>A   | ENSP00000221347.6:p.Gly1871Arg   | T:7.692e-03 |                         | r48402602              |               |                         |        | D                 |   |
|          | chr19   | 40376811  | C         | T   | missense_variant      | MODERATE                | ENST00000221347.6:c.11611G>A  | ENSP00000221347.6:p.Gly1871Arg |                                  | T:7.692e-03 |                         | r48402602              |               |                         |        | D                 |   |
|          | p22     | chr19     | 40376811  | C   | T                     | missense_variant        | MODERATE                      | ENST00000221347.6:c.11611G>A   | ENSP00000221347.6:p.Gly1871Arg   |             | T:7.692e-03             |                        | r48402602     |                         |        |                   | D |
|          | p17     | chr19     | 40377117  | C   | T                     | missense_variant        | MODERATE                      | ENST00000221347.6:c.11305G>A   | ENSP00000221347.6:p.Ala379Met    | T:0.0004    | T:1.226e-04             | r534122657             |               |                         |        | T                 |   |
|          | p22     | chr19     | 40392008  | G   | A                     | missense_variant        | MODERATE                      | ENST00000221347.6:c.8378C>T    | ENSP00000221347.6:p.Ala379Val    |             | A:6.611e-05             | r20102036&COSM3823077  |               |                         |        | T                 |   |
|          | p25     | chr19     | 40392008  | G   | A                     | missense_variant        | MODERATE                      | ENST00000221347.6:c.8378C>T    | ENSP00000221347.6:p.Ala379Val    |             | A:6.611e-05             | r20102036&COSM3823077  |               |                         |        | T                 |   |
|          | chr19   | 40392008  | G         | A   | missense_variant      | MODERATE                | ENST00000221347.6:c.8378C>T   | ENSP00000221347.6:p.Ala379Val  |                                  | A:6.611e-05 |                         | r20102036&COSM3823077  |               |                         |        | T                 |   |
|          | p29     | chr19     | 40392008  | G   | A                     | missense_variant        | MODERATE                      | ENST00000221347.6:c.8378C>T    | ENSP00000221347.6:p.Ala379Val    |             | A:6.611e-05             | r20102036&COSM3823077  |               |                         |        | T                 |   |
|          | p11     | chr19     | 40392339  | G   | T                     | missense_variant        | MODERATE                      | ENST00000221347.6:c.8165C>A    | ENSP00000221347.6:p.Pro722His    |             | A:1.395e-04&T:2.092e-03 | r578269913             |               |                         |        | D                 |   |
|          | p16     | chr19     | 40399385  | C   | T                     | missense_variant        | MODERATE                      | ENST00000221347.6:c.6310G>A    | ENSP00000221347.6:p.Gly1204Arg   |             | T:9.734e-03             | r201188964&COSM1481055 |               |                         |        | T                 |   |
|          | chr19   | 40399385  | C         | T   | missense_variant      | MODERATE                | ENST00000221347.6:c.6310G>A   | ENSP00000221347.6:p.Gly1204Arg |                                  | T:9.734e-03 |                         | r201188964&COSM1481055 |               |                         |        | T                 |   |
|          | p7      | chr19     | 40399385  | C   | T                     | missense_variant        | MODERATE                      | ENST00000221347.6:c.6310G>A    | ENSP00000221347.6:p.Gly1204Arg   |             | T:9.734e-03             | r201188964&COSM1481055 |               |                         |        | T                 |   |
|          | p25     | chr19     | 40402335  | G   | C                     | missense_variant        | MODERATE                      | ENST00000221347.6:c.6154C>G    | ENSP00000221347.6:p.Gln1722Glu   |             | C:0.029                 | r57247426              |               |                         |        | T                 |   |
|          | p16     | chr19     | 40408806  | C   | T                     | missense_variant        | MODERATE                      | ENST00000221347.6:c.4033G>A    | ENSP00000221347.6:p.Gly1345Ser   | T:0.0004    | T:9.890e-05&T:9.890e-03 | r57601714&rs148703638  |               |                         |        | T                 |   |
|          | p16     | chr19     | 40411643  | C   | T                     | missense_variant        | MODERATE                      | ENST00000221347.6:c.3985G>A    | ENSP00000221347.6:p.Val1329Ile   | T:0.0012    | T:6.919e-04             | r134826512             |               |                         |        | T                 |   |
|          | chr19   | 40420097  | C         | A   | missense_variant      | MODERATE                | ENST00000221347.6:c.2897G>T   | ENSP00000221347.6:p.Gly196Val  | A:0.0010                         | A:5.177e-04 | r1144899113             |                        |               |                         | D      |                   |   |
| KIF1C    | p25     | chr5      | 31271778  | A   | A                     | missense_variant        | MODERATE                      | ENST00000328819.2:c.638C>A     | ENSP00000309363.1:p.Arg210Ser    |             |                         |                        |               |                         |        | D                 |   |
| MA3T4    | p6      | chr5      | 66055573  | C   | T                     | missense_variant        | MODERATE                      | ENST00000403625.2:c.480C>T     | ENSP00000385727.1:p.Arg1347Pro   | T:9.099e-04 |                         | r200785678             |               |                         |        | D&D&D&D&D         |   |
|          | p10     | chr5      | 66449319  | G   | T                     | stop_gained             | HIGH                          | ENST00000403625.2:c.3559G>T    | ENSP00000385727.1:p.Gly1187Ter   |             |                         |                        |               |                         |        | D                 |   |
|          | p16     | chr5      | 66460352  | G   | A                     | missense_variant        | MODERATE                      | ENST00000403625.2:c.5345G>A    | ENSP00000385727.1:p.Arg1782Lys   | A:0.0016    | A:4.791e-03             | r115455153             |               | D&D&D&D&D               | T      |                   |   |
|          | p17     | chr5      | 66460390  | G   | A                     | missense_variant        | MODERATE                      | ENST00000403625.2:c.5383G>A    | ENSP00000385727.1:p.Val1795Ile   | A:0.0098    | A:0.01981&1.655e-05     | r117221458             |               |                         |        | T                 |   |
|          | p21     | chr5      | 66460390  | G   | A                     | missense_variant        | MODERATE                      | ENST00000403625.2:c.5383G>A    | ENSP00000385727.1:p.Val1795Ile   | A:0.0098    | A:0.01981&1.655e-05     | r117221458             |               |                         |        | T                 |   |
|          | p22     | chr5      | 66460390  | G   | A                     | missense_variant        | MODERATE                      | ENST00000403625.2:c.5383G>A    | ENSP00000385727.1:p.Val1795Ile   | A:0.0098    | A:0.01981&1.655e-05     | r117221458             |               |                         |        | T                 |   |
|          | p19     | chr5      | 66461713  | A   | G                     | missense_variant        | MODERATE                      | ENST00000403625.2:c.6706A>G    | ENSP00000385727.1:p.Ser2236Gly   | G:0.0058    | G:1.680e-03             | r56602793              |               | T&T&T&T                 | T      |                   |   |
|          | p12     | chr5      | 66462640  | A   | G                     | missense_variant        | MODERATE                      | ENST00000403625.2:c.7833A>G    | ENSP00000385727.1:p.Ser2543Gly   |             | G:8.289e-06             | r578737257             |               |                         |        | T                 |   |
| MROH2B   | p9      | chr5      | 41008777  | G   | A                     | missense_variant        | MODERATE                      | ENST00000399564.4:c.359C>T     | ENSP00000382476.4:p.Thr1180Ile   | A:0.0088    | A:2.000e-03             | r34245444              |               |                         |        | D&D&D             |   |
|          | p16     | chr5      | 41047826  | G   | A                     | missense_variant        | MODERATE                      | ENST00000399564.4:c.125G>T     | ENSP00000382476.4:p.Thr320Ile    |             |                         | r37501963              |               |                         |        | D&D&D             |   |
| NF1      | p6      | chr17     | 29496957  | T   | A                     | missense_variant        | MODERATE                      | ENST00000358273.4:c.538T>A     | ENSP00000351015.4:p.Asp176Glu    | A:0.0008    | A:3.270e-03             | r311236998&COSM24498   |               | Conflicting_interpreta  | T      | T                 |   |
|          | p17     | chr17     | 29496994  | A   | T                     | stop_gained             | HIGH                          | ENST00000358273.4:c.565A>T     | ENSP00000351015.4:p.Lys189Ter    |             |                         |                        |               |                         |        | D                 |   |
|          | p29     | chr17     | 29528480  | T   | C                     | missense_variant        | MODERATE                      | ENST00000358273.4:c.1237T>C    | ENSP00000351015.4:p.Ser413Pro    |             |                         |                        |               |                         |        | Pathogenic        |   |
|          | p6      | chr17     | 29541596  | T   | T                     | frameshift_variant      | HIGH                          | ENST00000358273.4:c.1521dupG   | ENSP00000351015.4:p.Leu501a1Ter3 |             |                         |                        |               |                         |        | D                 |   |
|          | p13     | chr17     | 29542629  | G   | T                     | stop_gained             | HIGH                          | ENST00000358273.4:c.1521dupG   | ENSP00000351015.4:p.Leu501a1Ter3 |             |                         |                        |               |                         |        | Pathogenic        |   |
|          | p13     | chr17     | 29550488  | A   | G                     | missense_variant        | MODERATE                      | ENST00000358273.4:c.1748A>G    | ENSP00000351015.4:p.Lys583Arg    |             |                         | r199474766&COSM36663   |               | Pathogenic/Likely_patho | T&T    | T                 |   |
|          | p7      | chr17     | 29554235  | G   | C                     | splice_acceptor_variant | HIGH                          | ENST00000358273.4:c.2252-1G>C  |                                  |             |                         | r587781577             |               |                         |        | Likely_pathogenic |   |
|          | p10     | chr17     | 2956079   | C   | T                     | stop_gained             | HIGH                          | ENST00000358273.4:c.2446C>T    | ENSP00000351015.4:p.Arg161Ter    |             |                         |                        |               |                         |        |                   |   |

**Supplemental Table 8: Somatic variant genes overlapped with PNF (Pemov et al, Re-analyzed with VarScan2)**

| SYMBOL | Patient | #CHROM | POS       | REF | ALT | Consequence        | IMPACT   | HGVSc                      | HGVSp                              | GMAF       | ExAC_MAF | Existing_variation      | ClinVar (2019) | SIFT    | MetaLR | MetaSVM |
|--------|---------|--------|-----------|-----|-----|--------------------|----------|----------------------------|------------------------------------|------------|----------|-------------------------|----------------|---------|--------|---------|
| DOCK10 | p22     | chr2   | 225750388 | C   | A   | missense_variant   | MODERATE | NST00000258390.7:c.747G>   | ENSP00000258390.7:p.Gln249His      |            |          |                         |                | D&D     | D      | T       |
| NF1    | p13     | chr17  | 29483036  | CAA | C   | frameshift_variant | HIGH     | T00000358273.4:c.98_99de   | ENSP00000351015.4:p.Lys33SerfsTer4 |            |          |                         |                |         |        |         |
|        | p7      | chr17  | 29527590  | C   | T   | stop_gained        | HIGH     | VST00000358273.4:c.1039C   | ENSP00000351015.4:p.Gln347Ter      |            |          | COSM1479414&COSM1479413 | Pathogenic     |         |        |         |
|        | p9      | chr17  | 29556992  | G   | A   | missense_variant   | MODERATE | IST00000358273.4:c.2990G>  | ENSP00000351015.4:p.Arg997Lys      |            |          |                         |                | T&T&T   | T      | T       |
|        | p23     | chr17  | 29654553  | C   | T   | stop_gained        | HIGH     | VST00000358273.4:c.5305C   | ENSP00000351015.4:p.Arg1769Ter     |            |          | COSM36883&COSM303874    | Pathogenic     |         |        |         |
|        | p10     | chr17  | 29665110  | C   | T   | stop_gained        | HIGH     | VST00000358273.4:c.6772C   | ENSP00000351015.4:p.Arg2258Ter     |            |          | COSM1324055&COSM215676  | Pathogenic     |         |        |         |
| OBSCN  | p15     | chr17  | 29683983  | C   | T   | stop_gained        | HIGH     | VST00000358273.4:c.7744C   | ENSP00000351015.4:p.Gln2582Ter     |            |          |                         |                |         |        |         |
|        | p19     | chr1   | 228465551 | G   | T   | missense_variant   | MODERATE | VST00000570156.2:c.8138G>  | ENSP00000455507.2:p.Arg2713Leu     |            |          |                         |                | T&T&T   | T      | T       |
|        | p17     | chr1   | 228486163 | G   | T   | missense_variant   | MODERATE | IST00000570156.2:c.12955G> | ENSP00000455507.2:p.Ala4319Ser     | T:8.361e-0 |          | rs765653440             |                | T&T     | T      | T       |
|        | p22     | chr1   | 228504457 | G   | T   | missense_variant   | MODERATE | IST00000570156.2:c.16204G> | ENSP00000455507.2:p.Ala5402Ser     |            |          |                         |                | T&T&T&T | T      | T       |
| RREB1  | p25     | chr1   | 228564931 | C   | A   | missense_variant   | MODERATE | ST00000570156.2:c.26089C   | ENSP00000455507.2:p.His8697Asn     |            |          |                         |                |         | T      | T       |
|        | p17     | chr6   | 7246860   | G   | T   | stop_gained        | HIGH     | VST00000379938.2:c.4177G>  | ENSP00000369270.2:p.Glu1393Ter     |            |          |                         |                |         |        |         |

**LOH variants (Pemov et al, Re-analyzed with VarScan2)**

| SYMBOL | Patient | #CHROM | POS       | REF   | ALT | Consequence        | IMPACT   | HGVSc                     | HGVSp                               | GMAF              | ExAC_MAF                | Existing_variation  | ClinVar (2019) | SIFT  | MetaLR | MetaSVM |
|--------|---------|--------|-----------|-------|-----|--------------------|----------|---------------------------|-------------------------------------|-------------------|-------------------------|---------------------|----------------|-------|--------|---------|
| ATM    | p29     | chr11  | 108124761 | T     | C   | missense_variant   | MODERATE | VST00000278616.4:c.2119T> | ENSP00000278616.4:p.Ser707Pro       | C:0.0044          | :7.808e-0               | rs4986761&COSM41595 | Benign/Li      | T&T&T | T      | T       |
| FCGBP  | p7      | chr19  | 40374034  | A     | G   | missense_variant   | MODERATE | IST00000221347.6:c.12044T | ENSP00000221347.5:p.Val4015Ala      | G:0.504&G:0.46009 | &rs138587194&COSM439495 |                     | T              | T     | T      |         |
| MDN1   | p10     | chr6   | 90408618  | T     | C   | missense_variant   | MODERATE | IST00000369393.3:c.9134A> | ENSP00000358400.3:p.Glu3045Gly      | C:0.0014          | :1.095e-0               | rs116103426         |                | T&T   | T      | T       |
| NF1    | p5      | chr17  | 29550493  | TTAAC | T   | frameshift_variant | HIGH     | 000358273.4:c.1756_1759d  | VSP00000351015.4:p.Thr586ValfsTer18 |                   |                         |                     | Pathogenic     |       |        |         |

## Supplemental Table 9:Disease-causing

|                                      | <b>Methods</b>                                                                                | <b>Category</b>                                                                                                                                               | <b>Description</b>                                                                                                |
|--------------------------------------|-----------------------------------------------------------------------------------------------|---------------------------------------------------------------------------------------------------------------------------------------------------------------|-------------------------------------------------------------------------------------------------------------------|
| <b>ClinVar clinical significance</b> | Repository                                                                                    | unknown, untested, non-pathogenic, probable-non-pathogenic, <b>probable-pathogenic, lkey-pathogenic, pathogenic</b> , drug-response,histocompatibility, other | asserted to be pathogenic or likely pathogenic by at least one submitter                                          |
| <b>SIFT</b>                          | P(An amino acid at a position is tolerated   The most frequentest amino acid being tolerated) | <b>D: Deleterious (sift&lt;=0.05)</b> ; T: tolerated (sift>0.05)                                                                                              | protein function based on sequence homology and the physico-chemical similarity between the alternate amino acids |
| <b>MetaLR</b>                        | Logistic regression                                                                           | <b>D: Deleterious</b> ; T: Tolerated; higher scores are more deleterious                                                                                      | Ensemble score                                                                                                    |
| <b>MetaSVM</b>                       | Support vector machine                                                                        | <b>D: Deleterious</b> ; T: Tolerated; higher scores are more deleterious                                                                                      | Ensemble score                                                                                                    |
